1 **Why does the zebrafish *cloche* mutant develop lens cataract?**

2 Mason Posner<sup>1</sup>, Matthew S. McDonald<sup>1</sup>, Kelly L. Murray<sup>1</sup>, and Andor J. Kiss<sup>2</sup>

3 <sup>1</sup>Department of Biology, Ashland University, Ashland, OH

4 <sup>2</sup>Center for Bioinformatics & Functional Genomics, Miami University, Oxford, OH

5

6

7 Corresponding author:

8

9 Mason Posner<sup>1</sup>

10 401 College Avenue, Ashland, OH 44805, USA

11 Phone: (419) 289-5691

12 email: [mposner@ashland.edu](mailto:mposner@ashland.edu)

13

14

15 **Keywords:** cataract, *cloche*, crystallins, denucleation, development, eye, lens, protein aggregation,  
16 RNA-Seq, tissue differentiation, zebrafish

17

18

19

20 **Abstract**

21

22 The zebrafish has become a valuable model for examining ocular lens development, physiology and  
23 disease. The zebrafish *cloche* mutant, first described for its loss of hematopoiesis, also shows reduced  
24 eye and lens size, interruption in lens cell differentiation and a cataract likely caused by abnormal  
25 protein aggregation. To facilitate the use of the *cloche* mutant for studies on cataract development and  
26 prevention we characterized variation in the lens phenotype, quantified changes in gene expression by  
27 qRT-PCR and RNA-Seq and compared the ability of two promoters to drive expression of introduced  
28 proteins into the *cloche* lens. We found that the severity of *cloche* embryo lens cataract varied, while  
29 the decrease in lens diameter and retention of nuclei in differentiating lens fiber cells was constant.  
30 We found very low expression of both  $\alpha$ B-crystallin genes (*cryaba* and *cryabb*) at 4 days post  
31 fertilization (dpf) by both qRT-PCR and RNA-Seq in *cloche*, *cloche* sibling and wildtype embryos and  
32 no significant difference in  $\alpha$ A-crystallin (*cryaa*) expression. RNA-Seq analysis of 4 dpf embryos  
33 identified transcripts from 25,281 genes, with 1,329 showing statistically significantly different  
34 expression between *cloche* and wildtype samples. Downregulation of eight lens  $\beta$ - and  $\gamma$ M-crystallin  
35 genes and 22 retinal related genes may reflect a general reduction in eye development and growth. Six  
36 stress response genes were upregulated. We did not find misregulation of any known components of  
37 lens development gene regulatory networks. These results suggest that the *cloche* lens cataract is not  
38 caused by loss of  $\alpha$ A-crystallin or changes to lens gene regulatory networks. Instead, we propose that  
39 the cataract results from general physiological stress related to loss of hematopoiesis. Our finding that  
40 the zebrafish  $\alpha$ A-crystallin promoter drove strong GFP expression in the *cloche* lens demonstrates its  
41 use as a tool for examining the effects of introduced proteins on lens crystallin aggregation and cataract  
42 prevention.

43 **Introduction:**

44  
45 The ocular lens provides an excellent model system for examining tissue development and physiology  
46 due to its transparency, accessibility and the presence of only two cell types. Cataract, the  
47 development of opacities that interfere with the transmittance of light to the retina, continues to be the  
48 leading cause of human blindness worldwide [1]. A better understanding of the mechanisms leading to  
49 lens cataract could foster the development of preventative strategies. In recent years the zebrafish has  
50 become a powerful model for examining eye lens biology [2,3]. Not only do their transparent, external  
51 embryos facilitate experiments with the lens, but it is also relatively easy to express introduced proteins  
52 and explore their impact on lens function [4,5]. Multiple studies have shown that lens development  
53 and protein content are well conserved between zebrafish and mammals, making zebrafish studies  
54 translatable to our understanding of human lens disease [5-9].

55  
56 Several zebrafish mutants have been described that exhibit lens cataracts during early development  
57 [10-12]. One of these, the *cloche* mutant, was first recognized by its cardiovascular system phenotype  
58 [13]. The homozygous *cloche* mutant lacks most endothelial and hematopoietic cells and does not  
59 survive past one-week post fertilization. A recent study identified a specific transcription factor gene  
60 affected in this mutant [14]. How this mutation leads to the lens phenotype is unclear. Goishi et al.  
61 [15] published the first study on the *cloche* lens, showing that mutant embryo lens fiber cells do not  
62 denucleate normally as they differentiate from the surrounding epithelial cell layer. They also showed  
63 that *cloche* lenses contained insoluble  $\gamma$ -crystallins, which may be the proximate cause of the lens  
64 opacity. Interestingly, the authors measured reduced expression of the lens small heat shock protein  
65  $\alpha$ A-crystallin in *cloche* lenses compared to wildtype embryos at 2, 3 and 4 days post fertilization (dpf)  
66 by relative end-point RT-PCR. Furthermore, they showed that overexpression of introduced  $\alpha$ A-  
67 crystallin by mRNA injection could rescue the lens opacity phenotype. The authors concluded that the

68 reduction in  $\alpha$ A-crystallin led to  $\gamma$ -crystallin insolubility and resulting cataract in the *cloche* phenotype  
69 embryo.

70

71 While the conclusion that reduced expression of  $\alpha$ A-crystallin leads to *cloche* lens cataract fits with our  
72 current understanding of the role  $\alpha$ -crystallins play in maintaining lens transparency, there are several  
73 observations that suggest that other factors may be contributing to cataract formation in this zebrafish  
74 mutant. First, we have previously shown that suppressing  $\alpha$ A-crystallin translation using synthetic  
75 RNA morpholinos does not produce a lens phenotype, even though  $\alpha$ A-crystallin protein levels are  
76 reduced to undetectable levels by western blot [16,17]. Second, Zou et al. [18] showed lens  
77 abnormalities in a zebrafish  $\alpha$ A-crystallin knockout line that are more subtle than the phenotype in the  
78 *cloche* lens with no reduction in lens size. And third, while microinjection of zebrafish  $\alpha$ A-crystallin  
79 mRNA [15] and introduction of a rat  $\alpha$ A-crystallin transgene [18] both reduced the severity of *cloche*  
80 lens cataract, it is possible that these proteins are hindering protein aggregation triggered by a  
81 mechanism other than loss of  $\alpha$ A-crystallin.

82

83 The goal of this present study was to further characterize the *cloche* lens phenotype and revisit its  
84 possible causes to facilitate this mutant's use as a model for studies on cataract development and  
85 prevention. We measured the levels of  $\alpha$ -crystallin expression in *cloche* embryos by quantitative RT-  
86 PCR and conducted a global analysis of *cloche* transcriptomics by RNA-Seq. We describe variation in  
87 the severity of the *cloche* lens cataract and examine any correlations with changes in lens diameter and  
88 fiber cell differentiation. Lastly, we measured the abilities of a well-characterized human  $\beta$ B1-  
89 crystallin promoter and a native zebrafish  $\alpha$ A-crystallin promoter to drive the expression of introduced  
90 protein into the *cloche* lens. In total, these experiments suggest that neither loss of  $\alpha$ A-crystallin nor  
91 disruption in lens gene regulatory networks are the cause of the *cloche* lens cataract. We propose

92 instead that the cataract results from a general physiological stress that triggers protein aggregation in  
93 the lens.

94

## 95 **Materials and Methods**

### 96 *Fish maintenance*

97 All protocols used in this study were approved by Ashland University's Animal Use and Care  
98 Committee (approval # MP 2015-1). Wildtype ZDR strain and *cloche*<sup>m39</sup> adults were maintained on a  
99 recirculating filtering system at approximately 28°C with a 14:10 hour light and dark cycle. Fish were  
100 fed twice each day with live *Artemia* brine shrimp or flake food. Fish were bred at the most once per  
101 week to collect embryos for observation and microinjection. Adult *cloche*<sup>m39</sup> individuals were  
102 obtained from the Zon Laboratory at Harvard University and their genotype was confirmed by PCR  
103 using primer sets described by Reischauer et al. [14].

104

### 105 *Visualization of lens phenotypes*

106 Embryos produced by incrossing *cloche* heterozygote fish were incubated at 28 °C in fish system water  
107 and transferred to 0.2 mM PTU at 6–30 h post fertilization to block melanin production. During  
108 microscopic visualization or collection for histology embryos were anesthetized in 0.016% tricaine.  
109 Lenses from whole live embryos were visualized by differential interference contrast microscopy on an  
110 Olympus IX71 inverted microscope and images were captured with a SPOT RT3 camera. The SPOT  
111 software was used to measure the diameter of each lens. Lenses were assigned to one of four classes  
112 based on the severity of the lens phenotype. Severity 3 lenses contained large central irregularities,  
113 severity 2 lenses contained small central irregularities and severity 1 lenses contained no central  
114 irregularity, but lacked the normal concentric lines formed by fiber cells in wildtype and sibling lenses.  
115 Embryonic lenses were also cryosectioned and stained with DAPI as described in Posner et al. [16].

116 The 4 dpf timepoint was selected for this analysis as fiber cell nuclei are typically removed in wildtype  
117 embryos by 3 dpf, allowing an additional day of development to gauge delay in the *cloche* embryos.  
118 We did not observe a noticeable qualitative change in the *cloche* cataract phenotype between 3 and 4  
119 dpf. Embryos were euthanized by slow reduction of water temperature to freezing.

120

### 121 *Quantitative RT-PCR analysis of $\alpha$ -crystallin expression*

122 Levels of  $\alpha$ A-,  $\alpha$ Ba- and  $\alpha$ Bb-crystallin expression were measured in wildtype, *cloche* and *cloche*  
123 sibling embryos using qRT-PCR. Embryos were collected at 4 dpf and chilled on ice before replacing  
124 system water with RNAlater (Thermo Fisher) and then stored in a  $-20^{\circ}\text{C}$  freezer until RNA  
125 purification. Embryos were stored between 1 h and several days. Approximately 20 embryos were  
126 pooled for RNA purification from each genotype for each biological replicate. Three biological  
127 replicates were collected from independent fish crosses. Total RNA from each sample was purified  
128 using an RNEasy Minikit (QIAGEN) with Qias shredder and quantified with a NanoDrop 1000  
129 Spectrophotometer (Thermo Scientific). Purified total RNA (2,000 ng) from each sample was treated  
130 with DNaseI (NEB) and 12  $\mu\text{l}$  was used to synthesize cDNA using the Protoscript II First Strand  
131 cDNA Synthesis Kit (NEB) with the oligo d(T)23 primer in a total volume of 40  $\mu\text{l}$ . The resulting  
132 cDNA sample was calculated to contain the equivalent of 16 ng/ $\mu\text{l}$  of original purified RNA.

133

134 All further procedures were identical to those described in Posner et al. [5] except that two reference  
135 genes were used instead of three (*efl* and *rpl13a*). In short, three biological replicates for each  
136 genotype were amplified in technical triplicate using Luna Universal qPCR Master Mix (NEB) on an  
137 Applied Biosystems StepOne Real-Time PCR System (Thermo Fisher). Primer pair design for the two  
138 endogenous control genes and three zebrafish  $\alpha$ -crystallin genes were previously published [19-21],  
139 and we previously validated the efficiency of these primers by standard curve and determined that they  
140 produced single amplification products [5]. Reaction conditions were identical to those previously

141 published [5] and identical analysis was done to determine delta Cq values (using recommended MIQE  
142 guideline nomenclature [22]), which were then visualized and statistically analyzed using R [23] and R  
143 Studio [24].

144

#### 145 *Comparison of cloche and wildtype gene expression by RNA-Seq*

146 Between 10 to 20 embryos preserved in RNAlater (Thermo Fisher) were removed from solution and  
147 homogenised in 200 µL of homogenisation solution in a Seal-Rite 1.5 ml microcentrifuge tube (USA  
148 Scientific) using a Microtip probe on a Fisherbrand™ Model 705 Sonic Dismembrator. Sonication was  
149 carried out for two periods of 10 seconds for a total of 10 Joules energy with a minute rest on wet-ice  
150 in between each disruption. Samples were judged to be homogenised when the sample was entirely  
151 homogeneous and no particulate matter settled to the bottom of the tube. Total RNA extraction was  
152 performed using a MAXWELL® 16 LEV simplyRNA Total RNA Tissue Kit (Promega) as per  
153 manufacturer's protocol and our previous reported methods [25]. Once isolated, total RNA was  
154 quantified by UV Nanodrop (Thermo Fisher NanoDrop 1000), and quality checked by Agilent  
155 BioAnalyzer2100 RNA Pico 6000 Chip Assay. Samples of total RNA with RINs below 8.0 were not  
156 used further.

157

158 Libraries for RNA-Seq compatible with Illumina short-read sequencing were constructed from the  
159 isolated, high-quality total RNA using the BIOO's NEXTFlex™ qRNA-Seq™ Kit v2 using unique  
160 molecular indices (UMIs) [26-28]. The inclusion of RNA-Seq libraries that employ UMIs reduces PCR  
161 introduced bias during library construction, thus increasing the accuracy of the quantitative nature of  
162 differential gene expression (DGE) in downstream analysis. Library quality and quantification was  
163 validated using BioAnalyzer2100 HS DNA Chip Assay and KAPA Universal Illumina Library  
164 Quantification Kit. Three biological samples from each condition, wild-type (WT) and cloche

165 phenotype (CP), were used to prepare libraries, for a total of six.

166

167 Libraries were quantitated, and frozen at -80°C and shipped on dry ice O/N by courier to the Center for  
168 Genome Research and Biocomputing (CGRB) at Oregon State University for sequencing on an  
169 Illumina HiSeq3000 platform. The six samples were loaded onto a single HiSeq3000 lane and data was  
170 acquired using a 2x150 bp paired-end run with a 10% PhiX spike-in to account for the low diversity of  
171 the UMIs within the first 9 nucleotides of both Read1 and Read2. Libraries were demultiplexed and  
172 raw FASTQ data retrieved from the CGRB (OSU) and processed at Miami University's Center for  
173 Bioinformatics & Functional Genomics (CBFG).

174

175 Bioinformatics analysis was performed on CLC Genomics Workbench 11.0.1 on an AMD Opteron  
176 Workstation using 256 GB ECC RAM and a 12 TB storage RAID5 array running Ubuntu 16.04.5  
177 LTS. Data were deconvoluted based on UMIs using the Molecular Indexing Plug-In (Toothfish  
178 Software) on CLC GW; trimmed, mapped to the zebrafish *Danio rerio* annotated genome, build  
179 GRCz10. Once reads were mapped, an RNA-Seq analysis experiment was performed (WT, CP).  
180 Statistical analysis was performed in a pairwise manner using the bootstrapped receiver operator  
181 characteristic (bROC) Plug-In 3.0 (BioFormatix, Inc). The use of the bROC Plug-In enables the non-  
182 parametric analysis of RNA-Seq data with low replicate numbers and enables a more robust and  
183 accurate DGE result [29,30]. The RNA-Seq experimental analysis was then annotated with GO term  
184 from within CLC GW and data exported to a CSV based spreadsheet for inspection. Data was visually  
185 plotted in CLC Genomics Workbench and plots were exported in SVG format for presentation in  
186 figures.

187

188 *Construction of expression plasmids, embryo microinjection and visualization of GFP expression*



189 The construction of a plasmid driving expression of green fluorescent protein (GFP) using a 1kb  
190 zebrafish  $\alpha$ A-crystallin promoter was previously described [5] and the plasmid is available from  
191 Addgene. A second plasmid driving GFP expression with a 296 bp fragment of the human  $\beta$ B1  
192 crystallin promoter was obtained from the Hall laboratory at the University of California at Irvine, and  
193 has been previously reported to drive expression in zebrafish lens [31]. We compared the ability of  
194 both promoters to drive the expression of GFP in *cloche* embryos to determine the best promoter to use  
195 in future experiments testing effects of introduced proteins on *cloche* cataract. To prepare promoter  
196 expression plasmids for injection into zebrafish embryos, plasmids were linearized with *NotI* (NEB),  
197 purified with the Monarch PCR and DNA Cleanup kit (NEB), and then dialyzed with 0.5X TE buffer  
198 using a 0.025  $\mu$ m VSWP membrane (Millipore, Billerica, MA, USA). Injection solutions contained 35  
199 ng/ $\mu$ l of the dialyzed plasmid, 0.2% phenol red and 0.1 M KCl to bring the solution to 5  $\mu$ l. Two  
200 nanoliters of this plasmid mix was injected into zebrafish zygotes with a Harvard Apparatus PL-90  
201 picoinjector (Holliston, MA, USA) using needles prepared with a Sutter P97 Micropipette Puller  
202 (Novato, CA, USA). Injection pressures were adjusted to inject 1 nl of plasmid solution with each 20  
203 ms pulse. Injected embryos were incubated at 28 °C in fish system water and transferred to 0.2 mM  
204 PTU at 6–30 h post fertilization to block melanin production and facilitate observation of GFP  
205 expression. Injected embryos were anesthetized in tricaine at 4 dpf and imaged at 200 $\times$  total  
206 magnification using UV illumination and GFP filter on an Olympus IX71 inverted microscope. Images  
207 were captured with a SPOT RT3 camera (Diagnostic Instruments, Sterling Heights, MI, USA).  
208

## 209 **Results**

210 Homozygous *cloche* embryos were recognizable by the presence of cardiac edema (Fig 1A compared  
211 to 1B), an abnormally shaped heart (Fig 1C and D), bent trunks, reduced eye size compared to non-  
212 phenotypic *cloche* siblings, and the lack of circulating red blood cells. Some of these features, such as  
213 cardiac edema and bent trunks, are typical of many abnormal embryos phenotypes. However, the loss  
214 of red blood cells and reduced eye size was diagnostic for the mutation. We confirmed that our *cloche*  
215 fish heterozygote breeding population contained the *cloche*<sup>m39</sup> allele by PCR amplifying the identified  
216 region of mutation using primers from [14](Fig 1E).

217

218 **Figure 1. Identification of *cloche* embryos.** View of the gross morphology of an embryo  
219 homozygous for the *cloche* mutant allele *m39* (A) compared to a non-phenotype sibling (B) at 4 dpf.  
220 Embryos were identified by the presence of cardiac edema, lack of red blood cells and characteristic  
221 irregularly shaped heart (C and D). The presence of the *m39 cloche* allele in our fish was confirmed by  
222 PCR genotyping using primer sets z1496 and z1452 (E; [14]).

223

224 *Severity of the cloche lens phenotype was variable*

225 Previous work characterized abnormalities in the *cloche* lens and quantified light reflectance, retention  
226 of fiber cell nuclei and eye and lens size [15,32]. We noticed wide variation in the visible opacities  
227 that develop in *cloche* embryo lenses and quantified the range of this phenotype using a severity scale  
228 that placed each lens in one of four possible categories (Fig 2). Data from 4 dpf *cloche* lenses showed  
229 that 47% fell within the most severe category (Fig 2: Sev 3), but that 12% of lenses showed minimal  
230 disturbance in transparency (Fig 2: Sev 1). However, no *cloche* phenotype lens showed the normal,  
231 concentric rings found in sibling lenses (Fig 2: Sib). All observed *cloche* siblings, which would be a  
232 mix of heterozygotes and homozygous wildtype, had no noticeable abnormality in transparency.

233

234 **Figure 2. Severity of the cloche lens phenotype varies, but is not correlated with lens diameter.**

235 *Cloche* embryos at 4 dpf were pooled into three severity groups. Representative lenses are shown for  
236 severity groups 3, 2, and 1, with group 3 being most severe. Percentages indicate the proportion of  
237 embryos with each severity (n=34). A representative normal lens is shown from a *cloche* sibling. The  
238 lens diameter in *cloche* embryos was uniformly reduced in all severity groups compared to siblings  
239 (ANOVA  $p$  value < 0.0001; Tukey Honest Significant Difference (HSD) post test used to identify  
240 statistically significant mean for sibling group (\*)).

241

242 We were interested in determining if smaller lens size and delay in fiber cell differentiation correlated  
243 with *cloche* lens opacity. Lens diameter of 4 dpf *cloche* embryos did not differ significantly between  
244 severity groups but were uniformly reduced compared to *cloche* siblings (Fig 2). We also found that  
245 fiber cell nuclei were retained in *cloche* embryos of all severities in comparison to *cloche* siblings,  
246 which retained no fiber cell nuclei at 4 dpf (Fig 3). We did see an unexpected statistically significant  
247 smaller average number of fiber cell nuclei in *cloche* embryos of the greatest severity (Fig 3: Severity  
248 3 compared to 2 and 1).

249

250 **Figure 3. Quantification of retained fiber cell nuclei in *cloche* lenses of different phenotype**

251 **severity compared to non-phenotype siblings by DAPI staining.** Images above the graph show  
252 representative lenses for each severity type at 4 dpf. Fiber cell nuclei were significantly more  
253 abundant in all *cloche* lenses compared to siblings. Within *cloche* embryos, severity type 3 lenses (the  
254 most severe) contained fewer nuclei than severity type 2 or 1 (ANOVA  $p$  value < 0.0001; letters  
255 indicate statistical groups determined by Tukey Honest Significant Difference (HSD) post test).

256

257 *Few lens specific genes showed changes in expression in cloche embryos compared to wildtype*

258 Goishi et al. [15] used semi-quantitative RT-PCR to show a decrease in  $\alpha$ A-crystallin mRNA in 2, 3  
259 and 4 dpf *cloche* embryos compared to wildtype embryos. We compared the expression of all three  
260 zebrafish  $\alpha$ -crystallin genes (*cryaa*, *cryaba*, *cryabb*) at 4 dpf in *cloche* phenotype, *cloche* siblings and  
261 wildtype fishes by qRT-PCR and found no significant differences in expression for any of these genes  
262 (Fig 4).

263

264 **Figure 4. Quantitative RT-PCR analysis of  $\alpha$ -crystallin expression at 4 dpf.** mRNA levels for  
265 each of the three zebrafish  $\alpha$ -crystallin genes were similar between *cloche* embryos, *cloche* siblings  
266 and wildtype embryos.  $\alpha$ B-crystallin gene expression was low and measurements more variable at  
267 these stages, similar to what we have previously reported [5]. There were no statistical differences in  
268 delta Cq values for each gene between sample type (ANOVA;  $\alpha$ A(F=1.6941, *p* value=0.261),  
269  $\alpha$ Ba(F=0.491, *p* value=0.6293),  $\alpha$ Bb(F=0.6327, *p* value=0.5632). Each Cq value represents a  
270 biological triplicate for each sample normalized to two reference genes, with lower values indicating  
271 higher levels of gene expression. Delta Cq values are indicated for the  $\alpha$ A-crystallin analysis.

272

273 We used RNA-Seq to analyze global gene expression differences between *cloche* phenotype embryos  
274 and wildtype embryos at 4 dpf. Our analysis collected over 400 million reads and identified transcripts  
275 from 25,281 genes, 1,329 of which were differentially expressed between *cloche* and wildtype  
276 embryos (Fig 5, Supplement 1). None of the three zebrafish  $\alpha$ -crystallin genes were found to be  
277 statistically significantly differentially expressed in *cloche* embryos compared to wildtype. Very low  
278 expression was observed for *cryaba* and *cryabb*, consistent with our qRT-PCR data and publicly  
279 available developmental RNA-Seq data for wildtype zebrafish  
280 (<https://www.ebi.ac.uk/gxa/experiments/E-ERAD-475>). We did find genes for one  $\alpha$ -crystallin and  
281 seven  $\gamma$ m-crystallins that were downregulated in *cloche* embryos and one crystallin gene (*crybg1b*) that  
282 was upregulated (Fig 5; Supplement 2). Several transcription factors known to regulate lens

283 development, such as *pax6a*, *foxe3*, *hsf4*, and *prox1a* were not differentially expressed in *cloche*  
284 embryos compared to wildtypes. However, *pax6b*, which is involved in cornea and lens development  
285 [33], was downregulated in *cloche*. The lens membrane protein gene *mipb* [31,34], which has been  
286 linked to cataract development, was also downregulated. The gene *sill*, which has been linked to  
287 Marinesco-Sjögren syndrome (MSS) including lens cataract [35], was upregulated in *cloche* embryos  
288 while *fabp11*, a fatty acid binding gene linked to eye development [36], was downregulated.

289

290 **Figure 5. RNA-Seq identified 1,329 genes with differential expression between 4 dpf wildtype**  
291 **and *cloche* embryos.** Transcripts were read from a total of 25,281 genes that are plotted by  
292 normalized expression levels in wildtype and *cloche* embryos (A). Panel B shows a subset of genes for  
293 lens crystallins, other lens related proteins, retinal related proteins and stress proteins. The two  $\alpha$ -  
294 crystallin genes identified in the RNA-Seq analysis did not differ in expression between wildtype and  
295 *cloche* but are included for reference. Confidence values for determining differential expression were  
296 produced by bROC analysis.

297

298 Over 20 retina related genes were downregulated in *cloche* embryos and at least two (*hbegfa* and *odc1*)  
299 showed increased expression (Fig 5; Supplement 2). This overall reduction in retina related gene  
300 expression may reflect the reduced retinal cell proliferation, cell survival and differentiation of retinal  
301 cell types identified in this mutant [32].

302

303 Our RNA-Seq analysis successfully identified the expected loss of *klhdc3*, *mrpl2* and *npas4l*  
304 expression in *cloche* embryos, three genes identified as being lost in this mutant line [14]. Other genes  
305 involved in hematopoiesis (*lclat1*) and oxygen delivery (*hbae1.1*, *hbbe1.3*, *hbbe1.1*) were strongly  
306 down regulated in *cloche* embryos as well (Supplement 1). The expression of an anoxia responsive  
307 gene, *phd3*, was not significantly changed in *cloche* embryos, similar to findings at 3 dpf by Dhakal et

308 al. [32] indicating that loss of blood circulation is not putting *cloche* embryos in anoxic stress.  
309 Interestingly, a number of heat shock protein genes (eg. *hspa13*, *hspb9*, *hspb1*, *hsp70.2*, *hsp70.3*) were  
310 upregulated in *cloche* embryos while one, *hspa41*, was downregulated (Fig 5; Supplement 2). Two  
311 genes identified through automated annotation of the zebrafish genome, both located on chromosome  
312 15, were upregulated from essentially no detectable expression in wildtype to strong expression in  
313 *cloche* (*si:ch211-181d7.1\_2* and *si:ch211-181d7.3*; Supplement 1). Both resulting proteins are  
314 predicted to bind ATP, but biological functions are not known.

315

### 316 *Characterization of native $\alpha$ A-crystallin promoter activity in cloche and wildtype lens*

317 We compared the activity of two lens crystallin promoters in *cloche* embryos to test a previously  
318 published hypothesis that the native zebrafish  $\alpha$ -crystallin promoter is downregulated in this mutant  
319 [15]. We also wanted to determine if one of these promoters would allow us to efficiently drive the  
320 expression of introduced proteins into *cloche* embryo lenses for future tests of their ability to suppress  
321 cataract formation. A native zebrafish  $\alpha$ A-crystallin promoter (-1000/+1) produced lens GFP  
322 expression in similarly high percentages of 4 dpf *cloche*, *cloche*-sibling and wildtype embryos (Fig 6).  
323 The human  $\beta$ B1-crystallin promoter (-223/+61), however, produced lens GFP expression in a  
324 statistically significantly lower proportion of both *cloche* and *cloche*-siblings compared to the zebrafish  
325  $\alpha$ A-crystallin promoter (Yates Corrected  $X^2$  test:  $X^2=16.85$ ,  $p$  value<0.001;  $X^2=21.38$ ,  $p$  value<0.001  
326 respectively). There was no statistical difference in wildtype embryos ( $X^2=3.35$ ,  $p$  value>0.05). The  
327 visible intensity of GFP expression was statistically significantly higher with the  $\alpha$ A-crystallin  
328 promoter in all three embryo types (t-test:  $p$  values =  $1.72 \times 10^{-7}$ ,  $6.33 \times 10^{-6}$  and 0.037 respectively).

329

330 **Figure 6. Percent of embryos with lens GFP expression after injection of zebrafish  $\alpha$ A-crystallin**  
331 **promoter/GFP and human  $\beta$ B1-crystallin promoter/GFP plasmids.** Data show that the native  $\alpha$ A-

332 crystallin promoter drives greater GFP expression in lens compared to the human  $\beta$ B1 promoter in  
333 *cloche* and non-phenotype siblings (Yates Corrected  $X^2$  test:  $X^2=16.85$ ,  $p$  value $<0.001$ ;  $X^2=21.38$ ,  $p$   
334 value $<0.001$  respectively), but this difference was not statistically significant in wildtype embryos  
335 ( $X^2=3.35$ ,  $p$  value $>0.05$ ). Each box and whisker blot represents two independent experiments (except  
336 for the  $\beta$ B1 sibling value which included three independent experiments). Each independent  
337 experiment included between 3 and 54 embryos at 4 dpf (median = 19). Inset shows an example of  
338 GFP lens expression in a *cloche* embryo produced by the  $\alpha$ A-crystallin promoter.

339

340 A time series experiment provided additional data to show that the zebrafish  $\alpha$ A-crystallin promoter is  
341 active in the lens of a higher proportion of embryos compared to the human  $\beta$ B1-crystallin promoter  
342 (Fig 7B). Interestingly, the human  $\beta$ B1- promoter did drive strong GFP expression in skeletal muscle  
343 and was active earlier than the  $\alpha$ A-promoter (Fig 7B). These data combined embryos of all genotypes.

344

345 **Figure 7. Timecourse of promoter activity in lens (A) and skeletal muscle (B) in all combined**  
346 **embryos.** Zebrafish  $\alpha$ A-crystallin promoter (circles) produced lens expression in a larger proportion  
347 of embryos by 36 hpf and drove GFP expression in over 85% of embryos by 72 hpf. The human  $\beta$ B1-  
348 crystallin promoter (triangles) drove surprisingly abundant expression in zebrafish skeletal muscle, but  
349 was less active in lens. Between 11 and 66 embryos were observed for each timepoint. Images C-F  
350 show representative examples of GFP expression with each promoter as indicated in lens (C and D)  
351 and skeletal muscle (E and F).

## 352 **Discussion**

353 Our work and that from others has identified at least three features of the *cloche* lens phenotype. The  
354 lens is smaller than normal, shows arrested denucleation of fiber cells and contains a noticeable central  
355 irregularity that previous studies have shown scatters light [15,32]. Data in this present study show  
356 that lens size and retention of fiber cells are similar in all *cloche* lenses, while the central irregularity  
357 can vary in severity. Goishi et al. [15] showed that *cloche* lenses include aggregated  $\gamma$ -crystallins,  
358 which likely contributes to the visual roughness seen by DIC microscopy. The variability in  
359 appearance of this lens irregularity suggests that it is stochastic. Whatever physiological and/or  
360 molecular mechanisms lead to reduced eye size and fiber cell denucleation arrest do not similarly  
361 dictate cataract formation, but may make the lens more prone to protein aggregation.

362

363 The *cloche* phenotype embryo does not appear to transcribe significantly reduced levels of  $\alpha$ A-  
364 crystallin mRNA compared to its non-phenotype siblings or wildtype zebrafish at 4 days post  
365 fertilization. This conclusion is supported by qRT-PCR and RNA-Seq data, as well as promoter  
366 expression data that show similar levels of GFP expression in *cloche* embryos and wildtype when  
367 driven by a native zebrafish  $\alpha$ A-crystallin promoter. Together, these data suggest that the *cloche* lens  
368 cataract is not triggered by a reduction in  $\alpha$ A-crystallin expression. There are possible reasons why  
369 this result differs from the decrease in  $\alpha$ A-crystallin expression reported by Goishi et al. [15]. First,  
370 while both studies used the same *cloche* allele (*m39*) we are likely propagating that allele in different  
371 genetic backgrounds. These genetic differences could influence *cryaa* expression. Second, we have  
372 used different methods to measure *cryaa* expression (qRT-PCR and RNA-Seq compared to end point  
373 RT-PCR). It is worth noting that our RNA-Seq data showed lower *cryaa* mean normalized expression  
374 in *cloche* embryos compared to wildtype (-0.85 fold, bROC confidence=0.937) but this difference was  
375 not statistically significant. While we cannot exclude the possibility that there is some reduction in



376 *cryaa* expression in *cloche* embryos, we believe that the data in this study provide strong evidence that  
377 loss of  $\alpha$ A-crystallin is not the cause of the *cloche* cataract.

378

379 Previously published knockout studies also suggest that loss of  $\alpha$ A-crystallin would not produce the  
380 severity of lens phenotype seen in the *cloche* mutant. The well characterized *cryaa* knockout mouse  
381 does not exhibit a lens cataract until seven weeks of age [37], later than the comparable *cloche*  
382 developmental stage examined here and in past studies. A recently published zebrafish TALEN  
383 knockout study identified a lens phenotype after disabling *cryaa* [18]. However, the reported lens  
384 phenotype is more subtle than found in the *cloche* lens. Expression of introduced  $\alpha$ A-crystallin can  
385 reduce light scatter in the *cloche* lens, indicating rescue of the phenotype by addition of this protein  
386 [15,18]. But a reasonable alternate hypothesis is that introduction of additional chaperoning protein  
387 may reduce protein aggregation no matter what its initial cause. Based on the data in this present study  
388 and findings from previously published work we propose that reduction in  $\alpha$ A-crystallin protein is not  
389 the sole cause of the *cloche* lens phenotype and suggest that another mechanism initiates the lens  
390 defects.

391

392 While the ultimate cause of the *cloche* lens cataract remains unknown, our RNA-Seq data suggest that  
393 dysregulation of known lens development-related transcription factors is not involved. The majority of  
394 the lens associated genes that do differ in expression between *cloche* phenotype and wildtype embryos  
395 code for structural proteins and are downregulated. The same pattern is seen in retinal genes, possibly  
396 reflecting reduced eye size caused by inhibition of ocular tissue development and growth [32].  
397 Interestingly, the opposite may be occurring with heart size as an increased number of cardiomyocytes  
398 in the *cloche* mutant could be driving increased expression of *actc1a* [38,39]. The increase in  
399 expression of multiple stress response genes for both larger Hsp70 proteins and smaller Hspb proteins  
400 suggests a general physiological stress response in the *cloche* embryo triggered by the lack of

401 hematopoiesis. Our RNA-Seq results are consistent with an hypothesis that *cloche* cataract formation  
402 is triggered by a general physiological stress and not a specific error in lens development gene  
403 regulatory networks. While cataract formation induced by this stress may be variable, leading to a  
404 range of phenotype severity, the reduction in *cloche* embryo lens diameter and delay in fiber cell  
405 differentiation is a more uniform response. It is possible that abnormal lens regulatory signaling in the  
406 *cloche* mutant is transient, and that our RNA-Seq analysis on 4 dpf embryos may have missed it.  
407 Resolving this possibility will require a future RNA-Seq timeseries analysis that covers key stages in  
408 lens development (lens placode delamination at 16 hpf; first fiber cell differentiation at 30 hpf; initial  
409 fiber cell denucleation at 72 hpf; [40]). For now we can conclude that the *cloche* lens phenotype,  
410 including the persistent loss of fiber cell denucleation, does not result from a noticeable change in the  
411 use of known lens gene regulatory networks.

412  
413 Our comparison of the ability of two crystallin promoters to drive GFP expression in the *cloche* lens is  
414 an important step towards using the *cloche* cataract as a model for protein aggregation and cataract  
415 prevention. Based on our results a native zebrafish promoter containing 1 kb of upstream sequence  
416 from the start codon can effectively drive protein expression almost exclusively in the lens and should  
417 be a good tool for transiently expressing introduced proteins to test their impact on cataract formation.  
418 These future studies should include proteomic analysis to quantify levels of introduced protein  
419 expression. Our unexpected finding that the human  $\beta$ B1-crystallin promoter drove lower GFP  
420 expression in *cloche* embryos compared to wildtype serves as a cautionary note that promoter activity  
421 needs to be assessed before they are used in experiments testing the effects of introduced lens proteins.

422  
423 The lack of noticeable changes to known molecular mechanisms underlying lens development in  
424 *cloche* embryos suggests that the presence of cataract in this mutant might not result from disturbances  
425 in lens specific gene regulation. Instead, the *cloche* lens may simply be responding to a general

426 physiological stress, and changes to the expression of some lens crystallins may be a byproduct of, and  
427 not directly related to, a disturbance in crystallin-specific gene regulatory networks. However,  
428 additional time points added to our RNA-Seq analysis may provide an opportunity to observe transient  
429 changes in lens gene regulatory networks or uncover novel signaling molecules that contribute to lens  
430 development. What seems clear is that the *cloche* lens phenotype does not result from a significant loss  
431 of  $\alpha$ A-crystallin expression. Whether or not the *cloche* zebrafish can provide further insights into the  
432 regulation of lens development, the presence of its lens cataract can be used to study lens crystallin  
433 aggregation and cataract prevention.

434

#### 435 **Acknowledgements**

436 This work was supported by an R15 AREA grant from the National Eye Institute (EY013535) to MP  
437 and from grants to support faculty/student research from the Provost Office of Ashland University and  
438 a summer student research stipend was provided as part of a Choose Ohio First scholarship grant to  
439 Ashland University to KLM. The *cloche*<sup>m39</sup> line was provided by the Zon laboratory at Harvard  
440 University and the human  $\beta$ B1-crystallin promoter construct was provided by the Hall lab at UC  
441 Irvine. Emmaline Kepp helped with analysis of the *cloche* phenotype. We would like to thank the  
442 Busch-Nentwich lab for providing publically available developmental zebrafish time series RNA-seq  
443 data used to validate the novel RNA-Seq data presented in this paper. Kirsten Lampi, Elizabeth  
444 LeClair and Saulius Sumanas provided feedback on the manuscript.

445 **References**

- 446 1. Bourne RA, Stevens GA, White RA, Smith JL, Flaxman SR, Price H, et al. Causes of vision loss  
447 worldwide, 1990–2010: a systematic analysis. *The Lancet Global Health*. Bourne et al. Open  
448 Access article distributed under the terms of CC BY; 2013;1: e339–e349. doi:10.1016/s2214-  
449 109x(13)70113-x
- 450 2. Vihtelic TS. Teleost lens development and degeneration. *Int Rev Cell Mol Biol*. 2008;269: 341–  
451 373. doi:10.1016/S1937-6448(08)01006-X
- 452 3. Bibliowicz J, Tittle RK, Gross JM. Toward a Better Understanding of Human Eye Disease.  
453 *Progress in Molecular Biology and Translational Science*. Elsevier; 2011. pp. 287–330.  
454 doi:10.1016/B978-0-12-384878-9.00007-8
- 455 4. Wu S-Y, Zou P, Mishra S, McHaourab HS. Transgenic zebrafish models reveal distinct  
456 molecular mechanisms for cataract-linked  $\alpha$ A-crystallin mutants. Yan Y-B, editor. *PLoS ONE*.  
457 *Public Library of Science*; 2018;13: e0207540–14. doi:10.1371/journal.pone.0207540
- 458 5. Posner M, Murray KL, McDonald MS, Eighinger H, Andrew B, Drossman A, et al. The  
459 zebrafish as a model system for analyzing mammalian and native  $\alpha$ -crystallin promoter function.  
460 *PeerJ*. PeerJ Inc; 2017;5: e4093–27. doi:10.7717/peerj.4093
- 461 6. Greiling TMS, Clark JI. Early lens development in the zebrafish: a three-dimensional time-lapse  
462 analysis. *Dev Dyn*. 2009;238: 2254–2265. doi:10.1002/dvdy.21997
- 463 7. Greiling TMS, Houck SA, Clark JI. The zebrafish lens proteome during development and aging.  
464 *Mol Vis*. 2009;15: 2313–2325.
- 465 8. Wages P, Horwitz J, Ding L, Corbin RW, Posner M. Changes in zebrafish (*Danio rerio*) lens

- 466 crystallin content during development. *Mol Vis.* 2013;19: 408–417.
- 467 9. Posner M, Hawke M, Lacava C, Prince CJ, Bellanco NR, Corbin RW. A proteome map of the  
468 zebrafish (*Danio rerio*) lens reveals similarities between zebrafish and mammalian crystallin  
469 expression. *Mol Vis.* 2008;14: 806–814.
- 470 10. Vihtelic TS, Yamamoto Y, Springer SS, Jeffery WR, Hyde DR. Lens opacity and photoreceptor  
471 degeneration in the zebrafish lens opaque mutant. *Dev Dyn.* 2005;233: 52–65.  
472 doi:10.1002/dvdy.20294
- 473 11. Semina EV, Bosenko DV, Zinkevich NC, Soules KA, Hyde DR, Vihtelic TS, et al. Mutations in  
474 laminin alpha 1 result in complex, lens-independent ocular phenotypes in zebrafish. *Dev Biol.*  
475 2006;299: 63–77. doi:10.1016/j.ydbio.2006.07.005
- 476 12. Gross JM, Perkins BD. Zebrafish mutants as models for congenital ocular disorders in humans.  
477 *Mol Reprod Dev.* Wiley-Blackwell; 2008;75: 547–555. doi:10.1002/mrd.20831
- 478 13. Stainier DY, Weinstein BM, Detrich HW, Zon LI, Fishman MC. Cloche, an early acting  
479 zebrafish gene, is required by both the endothelial and hematopoietic lineages. *Development.*  
480 1995;121: 3141–3150.
- 481 14. Reischauer S, Stone OA, Villasenor A, Chi N, Jin S-W, Martin M, et al. Cloche is a bHLH-PAS  
482 transcription factor that drives haemato-vascular specification. *Nature. Nature Research;*  
483 2016;535: 294–298. doi:doi:10.1038/nature18614
- 484 15. Goishi K, Shimizu A, Najarro G, Watanabe S, Rogers R, Zon LI, et al. AlphaA-crystallin  
485 expression prevents gamma-crystallin insolubility and cataract formation in the zebrafish cloche  
486 mutant lens. *Development.* 2006;133: 2585–2593. doi:10.1242/dev.02424

- 487 16. Posner M, Skiba J, Brown M, Liang JO, Nussbaum J, Prior H. Loss of the small heat shock  
488 protein  $\alpha$ A-crystallin does not lead to detectable defects in early zebrafish lens development.  
489 *Exp Eye Res.* 2013;116: 227–233. doi:10.1016/j.exer.2013.09.007
- 490 17. Hinaux H, Recher G, Alié A, Legendre L, Blin M, Rétaux S. Lens apoptosis in the Astyanax  
491 blind cavefish is not triggered by its small size or defects in morphogenesis. Escrivá H, editor.  
492 *PLoS ONE. Public Library of Science*; 2017;12: e0172302–11.  
493 doi:10.1371/journal.pone.0172302
- 494 18. Zou P, Wu S-Y, Koteiche HA, Mishra S, Levic DS, Knapik E, et al. A conserved role of  $\alpha$ A-  
495 crystallin in the development of the zebrafish embryonic lens. *Exp Eye Res. Elsevier Ltd*;  
496 2015;138: 104–113. doi:10.1016/j.exer.2015.07.001
- 497 19. Tang R, Dodd A, Lai D, McNabb WC, Love DR. Validation of zebrafish (*Danio rerio*) reference  
498 genes for quantitative real-time RT-PCR normalization. *Acta Biochimica et Biophysica Sinica.*  
499 2007;39: 384–390.
- 500 20. McCurley AT, Callard GV. Characterization of housekeeping genes in zebrafish: male-female  
501 differences and effects of tissue type, developmental stage and chemical treatment. *BMC Mol*  
502 *Biol. BioMed Central*; 2008;9: 102. doi:10.1186/1471-2199-9-102
- 503 21. Elicker KS, Hutson LD. Genome-wide analysis and expression profiling of the small heat shock  
504 proteins in zebrafish. *Gene.* 2007;403: 60–69. doi:10.1016/j.gene.2007.08.003
- 505 22. Bustin SA, Benes V, Garson JA, Hellemans J, Huggett J, Kubista M, et al. The MIQE  
506 guidelines: minimum information for publication of quantitative real-time PCR experiments.  
507 *Clinical Chemistry. Clinical Chemistry*; 2009. pp. 611–622. doi:10.1373/clinchem.2008.112797

- 508 23. R Core Team. R: A Language and Environment for Statistical Computing [Internet]. Vienna,  
509 Austria: R Foundation for Statistical Computing. Available: <https://www.R-project.org/>
- 510 24. Home - RStudio. Boston, MA: RStudio, Inc; 2014. Available: <http://www.rstudio.com/>
- 511 25. Sellin Jeffries MK, Kiss AJ, Smith AW, Oris JT. A comparison of commercially-available  
512 automated and manual extraction kits for the isolation of total RNA from small tissue samples.  
513 BMC Biotechnol. BioMed Central; 2014;14: 1601–13. doi:10.1186/s12896-014-0094-8
- 514 26. Casbon JA, Osborne RJ, Brenner S, Lichtenstein CP. A method for counting PCR template  
515 molecules with application to next-generation sequencing. Nucleic Acids Res. 2011;39: e81–  
516 e81. doi:10.1093/nar/gkr217
- 517 27. Fu GK, Xu W, Wilhelmy J, Mindrinos MN, Davis RW, Xiao W, et al. Molecular indexing  
518 enables quantitative targeted RNA sequencing and reveals poor efficiencies in standard library  
519 preparations. Proc Natl Acad Sci USA. 2014;111: 1891–1896. doi:10.1073/pnas.1323732111
- 520 28. Scientific B, Alto P. *Molecular indexing for improved RNA-Seq analysis*. 2013.
- 521 29. BioFormatix. bROC: Analysis of Gene Expression in Microarray and RNA-Seq Experiments.  
522 2013.
- 523 30. BioFormatix. Using bROC for Analysis of Differential Expression in RNA-Seq Data. 2013;; 1–  
524 6.
- 525 31. Clemens DM, Németh-Cahalan KL, Trinh L, Zhang T, Schilling TF, Hall JE. In vivo analysis of  
526 aquaporin 0 function in zebrafish: permeability regulation is required for lens transparency.  
527 Invest Ophthalmol Vis Sci. 2013;54: 5136–5143. doi:10.1167/iovs.13-12337
- 528 32. Dhakal S, Stevens CB, Sebbagh M, Weiss O, Frey RA, Adamson S, et al. Abnormal retinal

- 529 development in Clochemutant zebrafish. *Dev Dyn.* 2015;244: 1439–1455.  
530 doi:10.1002/dvdy.24322
- 531 33. Takamiya M, Weger BD, Schindler S, Beil T, Yang L, Armant O, et al. Molecular description  
532 of eye defects in the zebrafish Pax6b mutant, sunrise, reveals a Pax6b-dependent genetic  
533 network in the developing anterior chamber. *PLoS ONE. Public Library of Science*; 2015;10:  
534 e0117645. doi:10.1371/journal.pone.0117645
- 535 34. Froger A, Clemens D, Kalman K, Németh-Cahalan KL, Schilling TF, Hall JE. Two distinct  
536 aquaporin 0s required for development and transparency of the zebrafish lens. *Invest*  
537 *Ophthalmol Vis Sci.* 2010;51: 6582–6592. doi:10.1167/iovs.10-5626
- 538 35. Kawahara G, Hayashi YK. Characterization of Zebrafish Models of Marinesco-Sjögren  
539 Syndrome. Hendershot LM, editor. *PLoS ONE. Public Library of Science*; 2016;11: e0165563–  
540 12. doi:10.1371/journal.pone.0165563
- 541 36. Qi J, Dong Z, Shi Y, Wang X, Qin Y, Wang Y, et al. NgAgo-based fabp11a gene knockdown  
542 causes eye developmental defects in zebrafish. *Cell Res. Nature Publishing Group*; 2016;26:  
543 1349–1352. doi:10.1038/cr.2016.134
- 544 37. Brady JP, Garland D, Duglas-Tabor Y, Robison WG, Groome A, Wawrousek EF. Targeted  
545 disruption of the mouse alpha A-crystallin gene induces cataract and cytoplasmic inclusion  
546 bodies containing the small heat shock protein alpha B-crystallin. *Proc Natl Acad Sci USA.*  
547 1997;94: 884–889.
- 548 38. Schoenebeck JJ, Keegan BR, Yelon D. Vessel and Blood Specification Override Cardiac  
549 Potential in Anterior Mesoderm. *Developmental Cell.* 2007;13: 254–267.  
550 doi:10.1016/j.devcel.2007.05.012



551 39. Palencia-Desai S, Kohli V, Kang J, Chi NC, Black BL, Sumanas S. Vascular endothelial and  
552 endocardial progenitors differentiate as cardiomyocytes in the absence of *Etsrp/Etv2* function.  
553 *Development*. 2011;138: 4721–4732. doi:10.1242/dev.064998

554 40. Greiling TMS, Aose M, Clark JI. Cell fate and differentiation of the developing ocular lens.  
555 *Invest Ophthalmol Vis Sci*. 2010;51: 1540–1546. doi:10.1167/iovs.09-4388

556

### 557 **Supplement Captions**

558 **Supplemental Table 1.** List of 50 genes with the greatest bROC confidence levels for change in  
559 expression at 4 dpf. Gene symbol, mean normalized expression values for wildtype and *cloche*, fold  
560 change, confidence level and gene ontology (GO) biological or molecular processes are shown. Some  
561 GO terms have not been identified and are left blank. Fold changes calculated by the bootstrapping  
562 bROC method are smaller and more conservative than those determined by non-bootstrapping  
563 methods.

564

565 **Supplemental Table 2.** A subset of differentially expressed genes that are plotted in Fig 5B.  
566 Normalized expression was averaged across the three biological replicates for wildtype and *cloche*  
567 embryos. Fold change, bROC confidence levels and general biological function are indicated. Fold  
568 changes calculated by the bootstrapping bROC method are smaller and more conservative than those  
569 determined by non-bootstrapping methods.

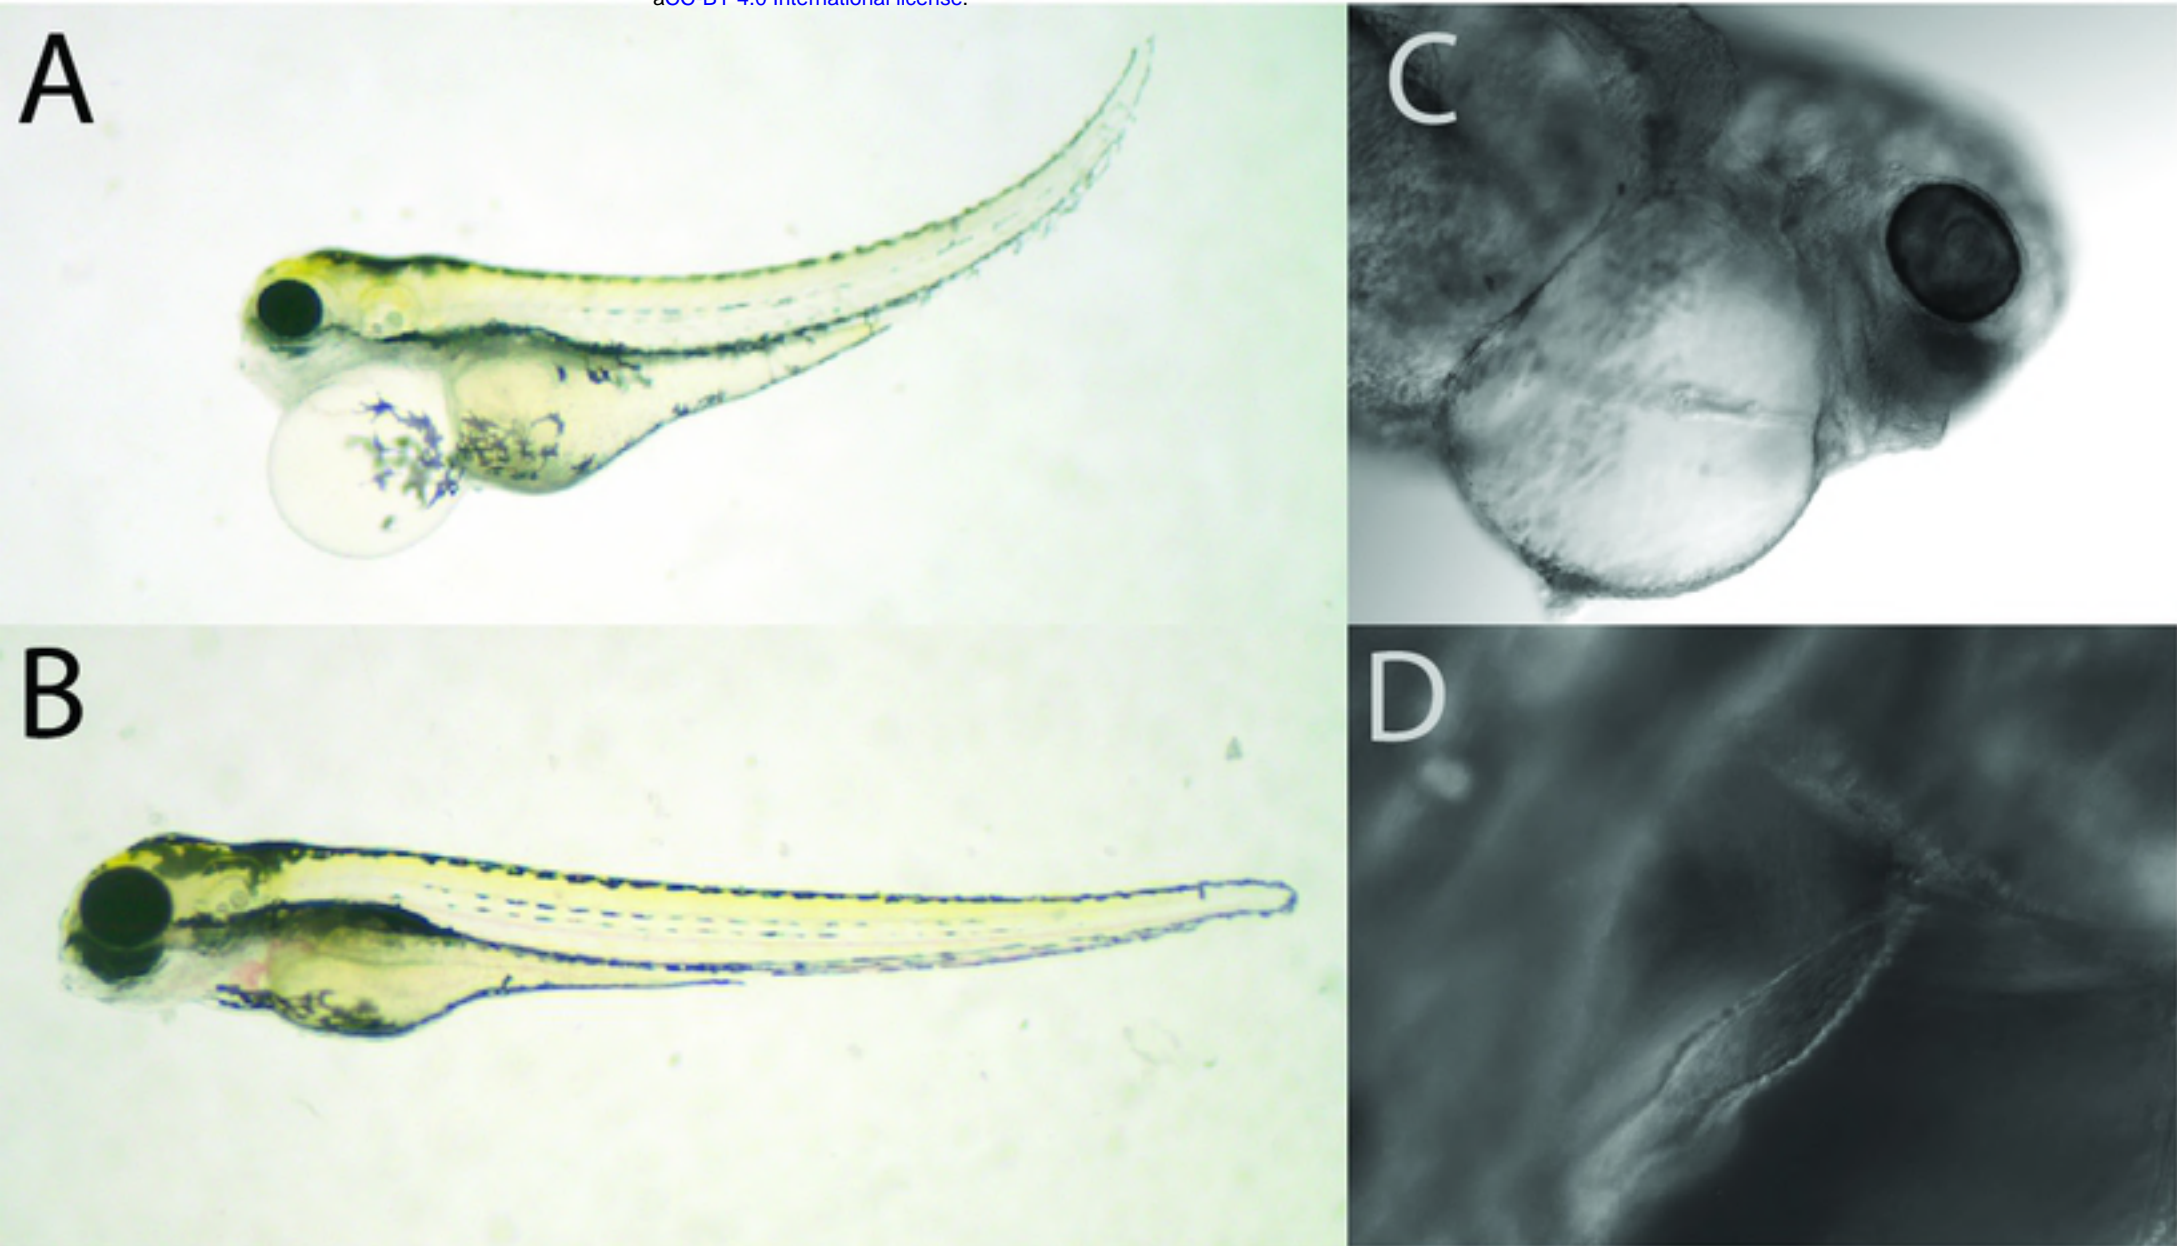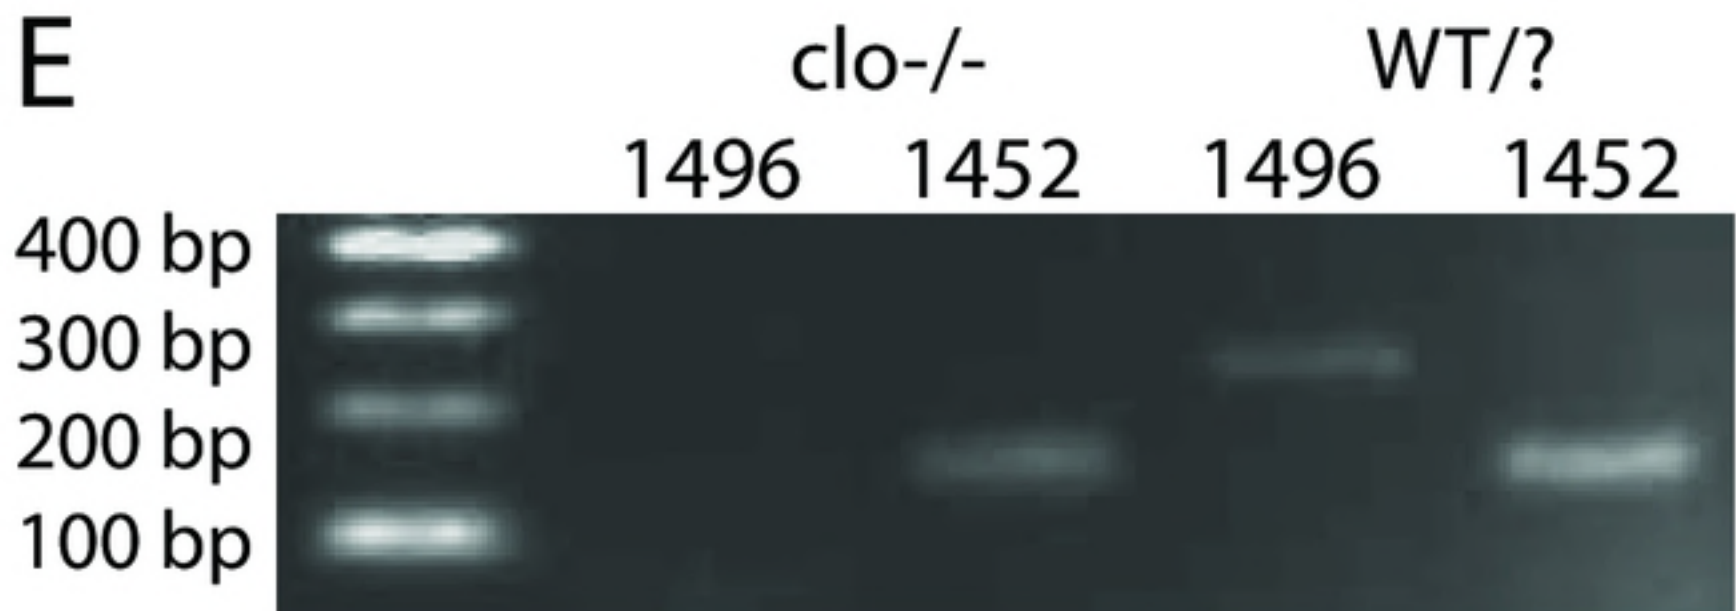

Figure 1

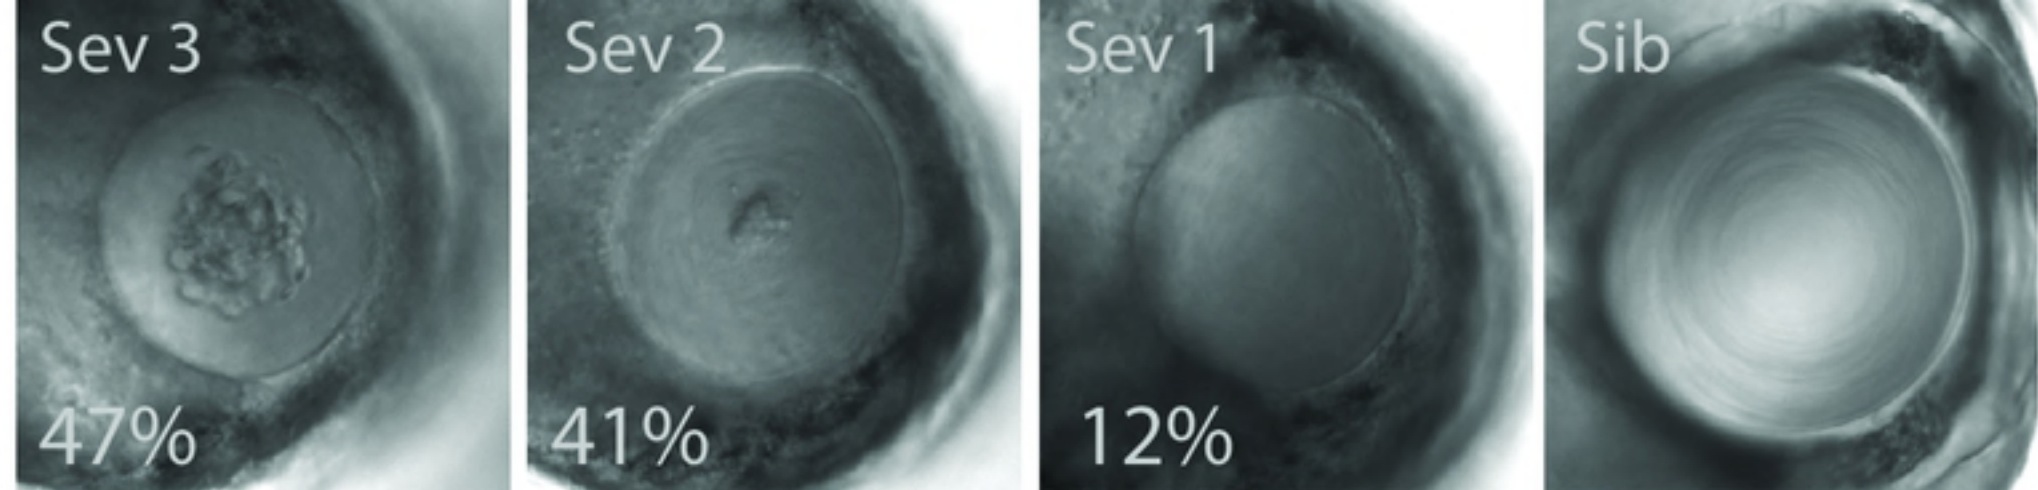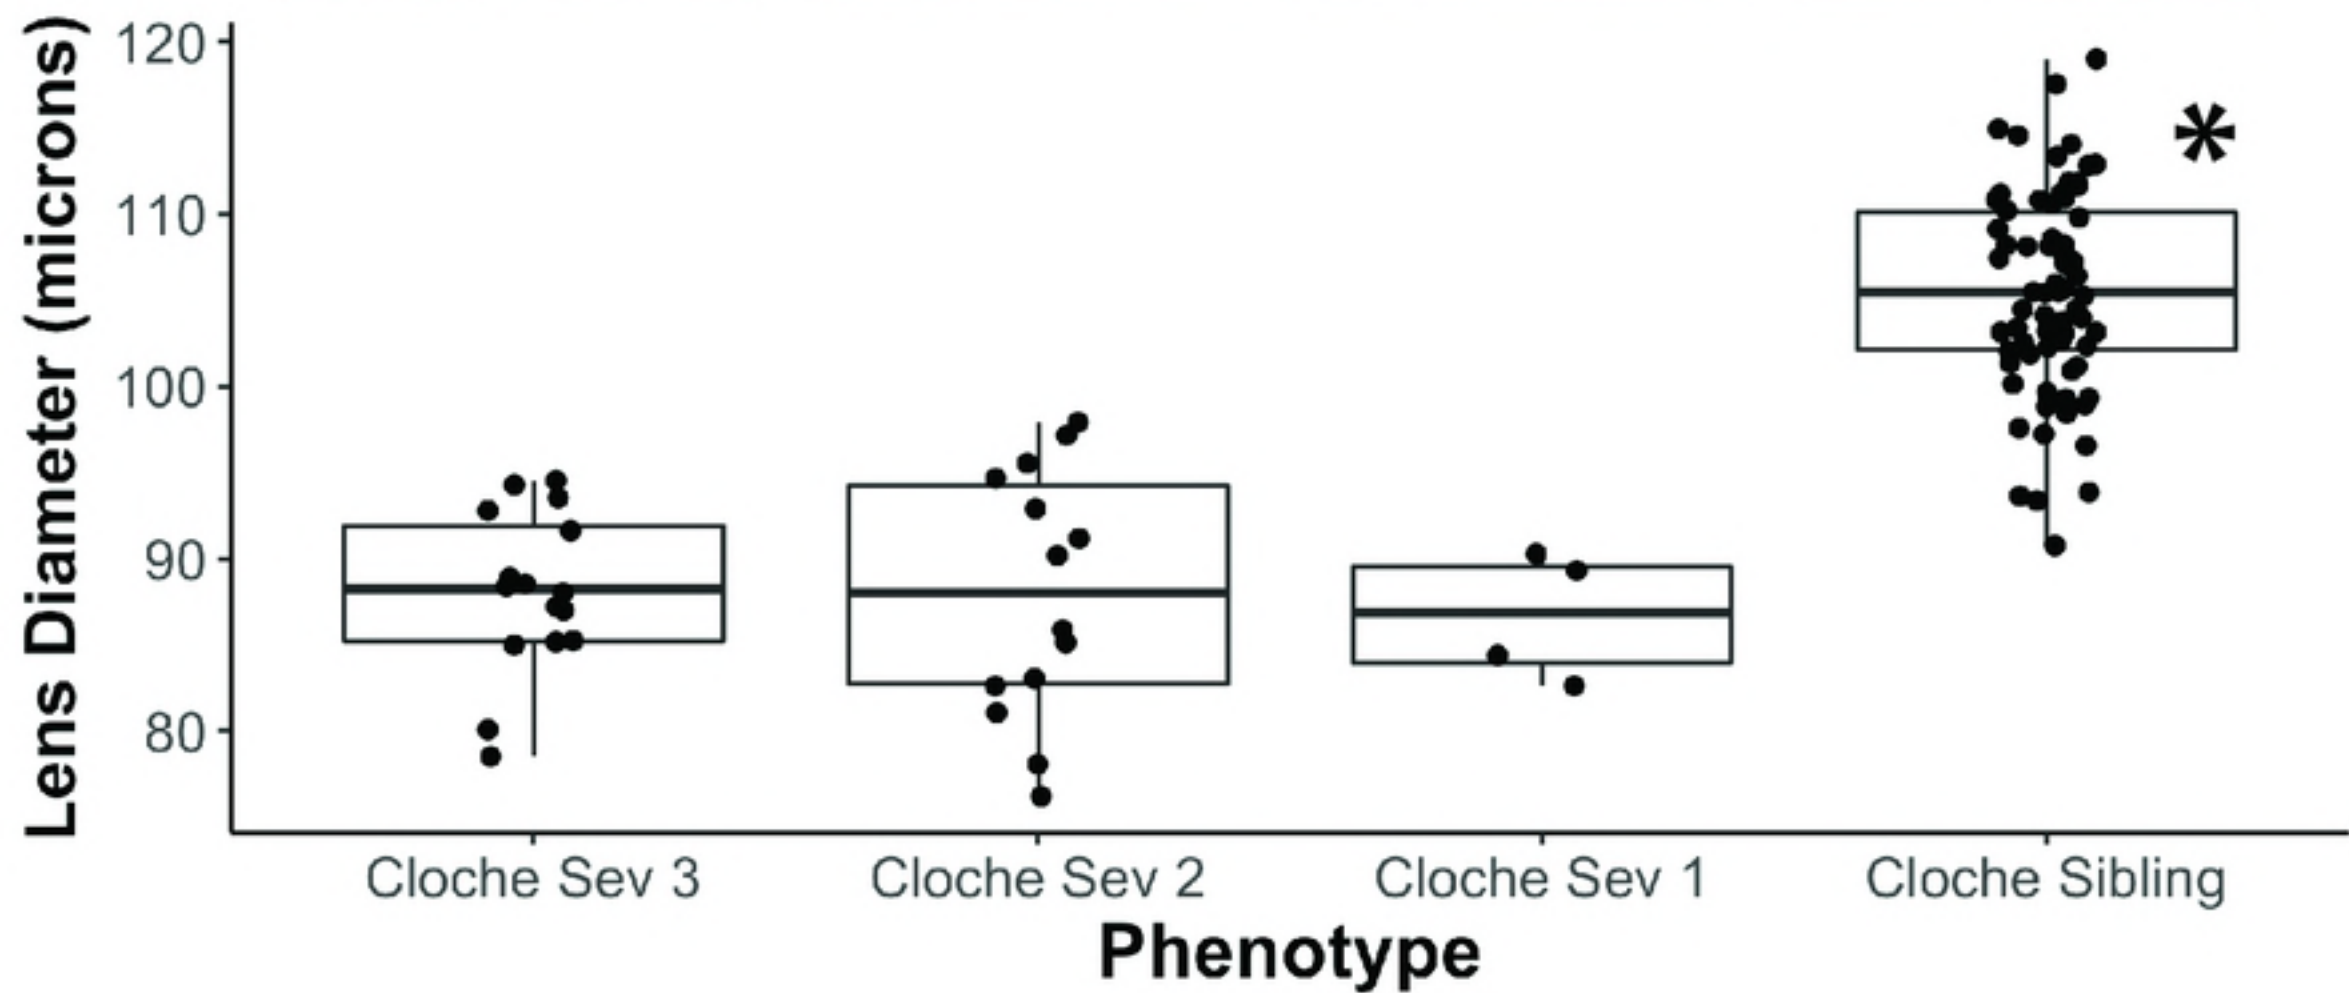

Figure 2



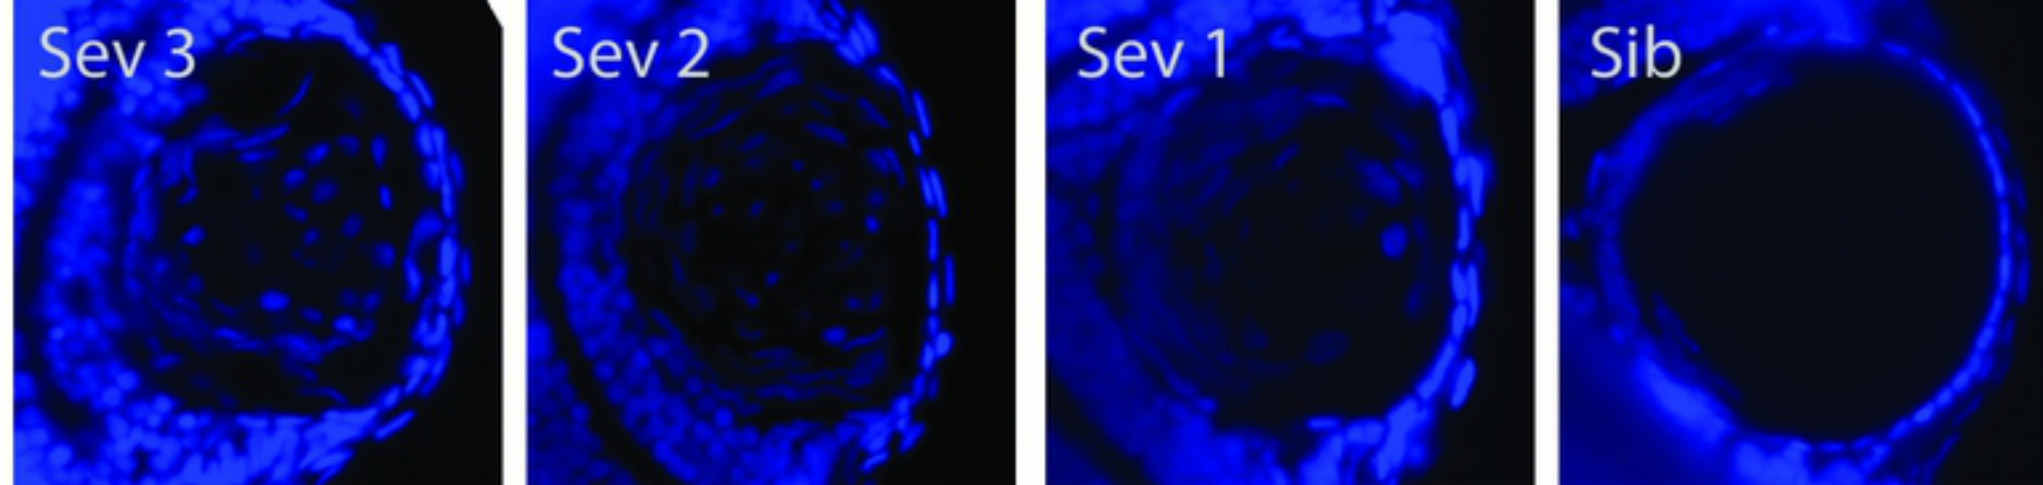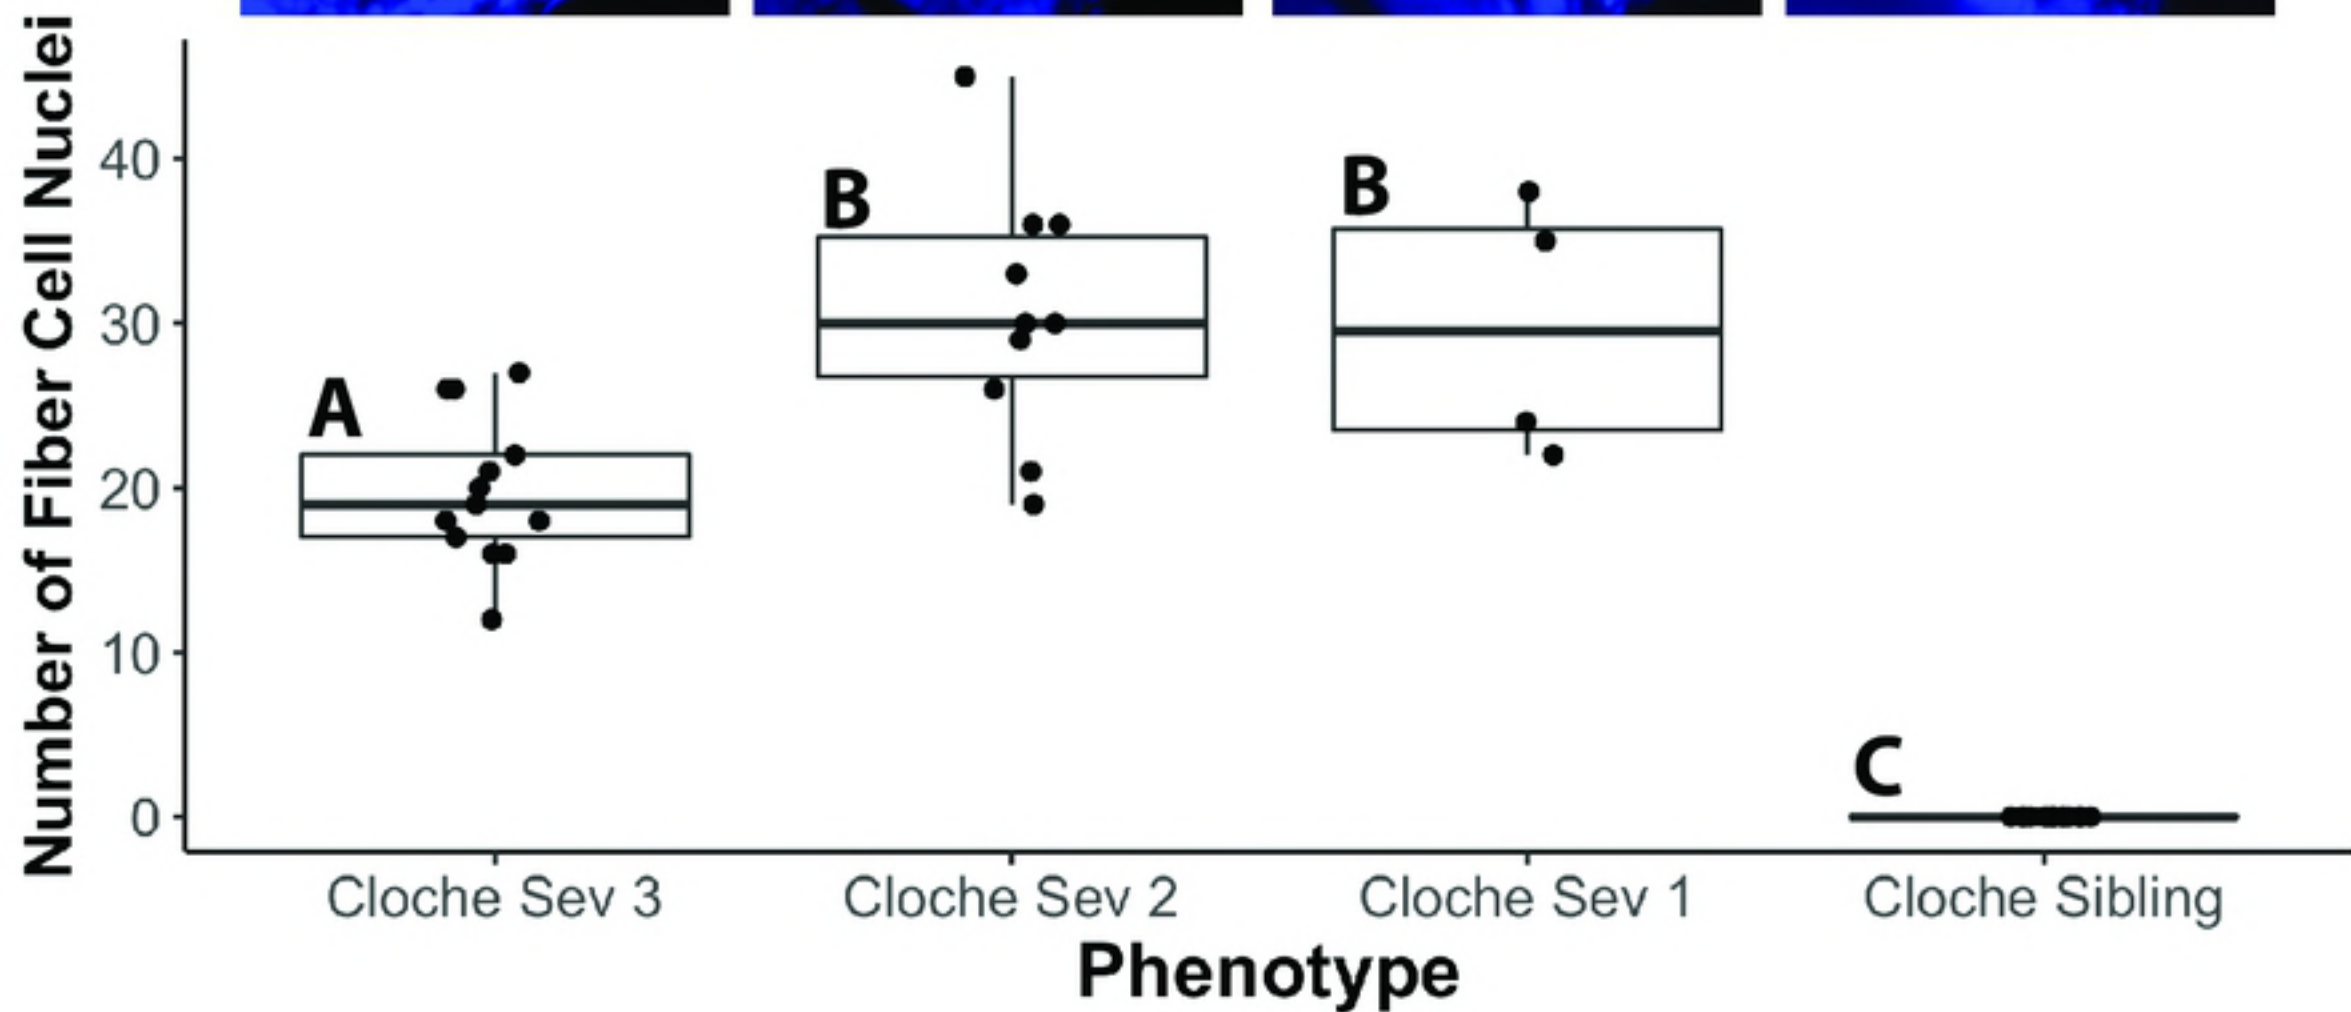

Figure 3

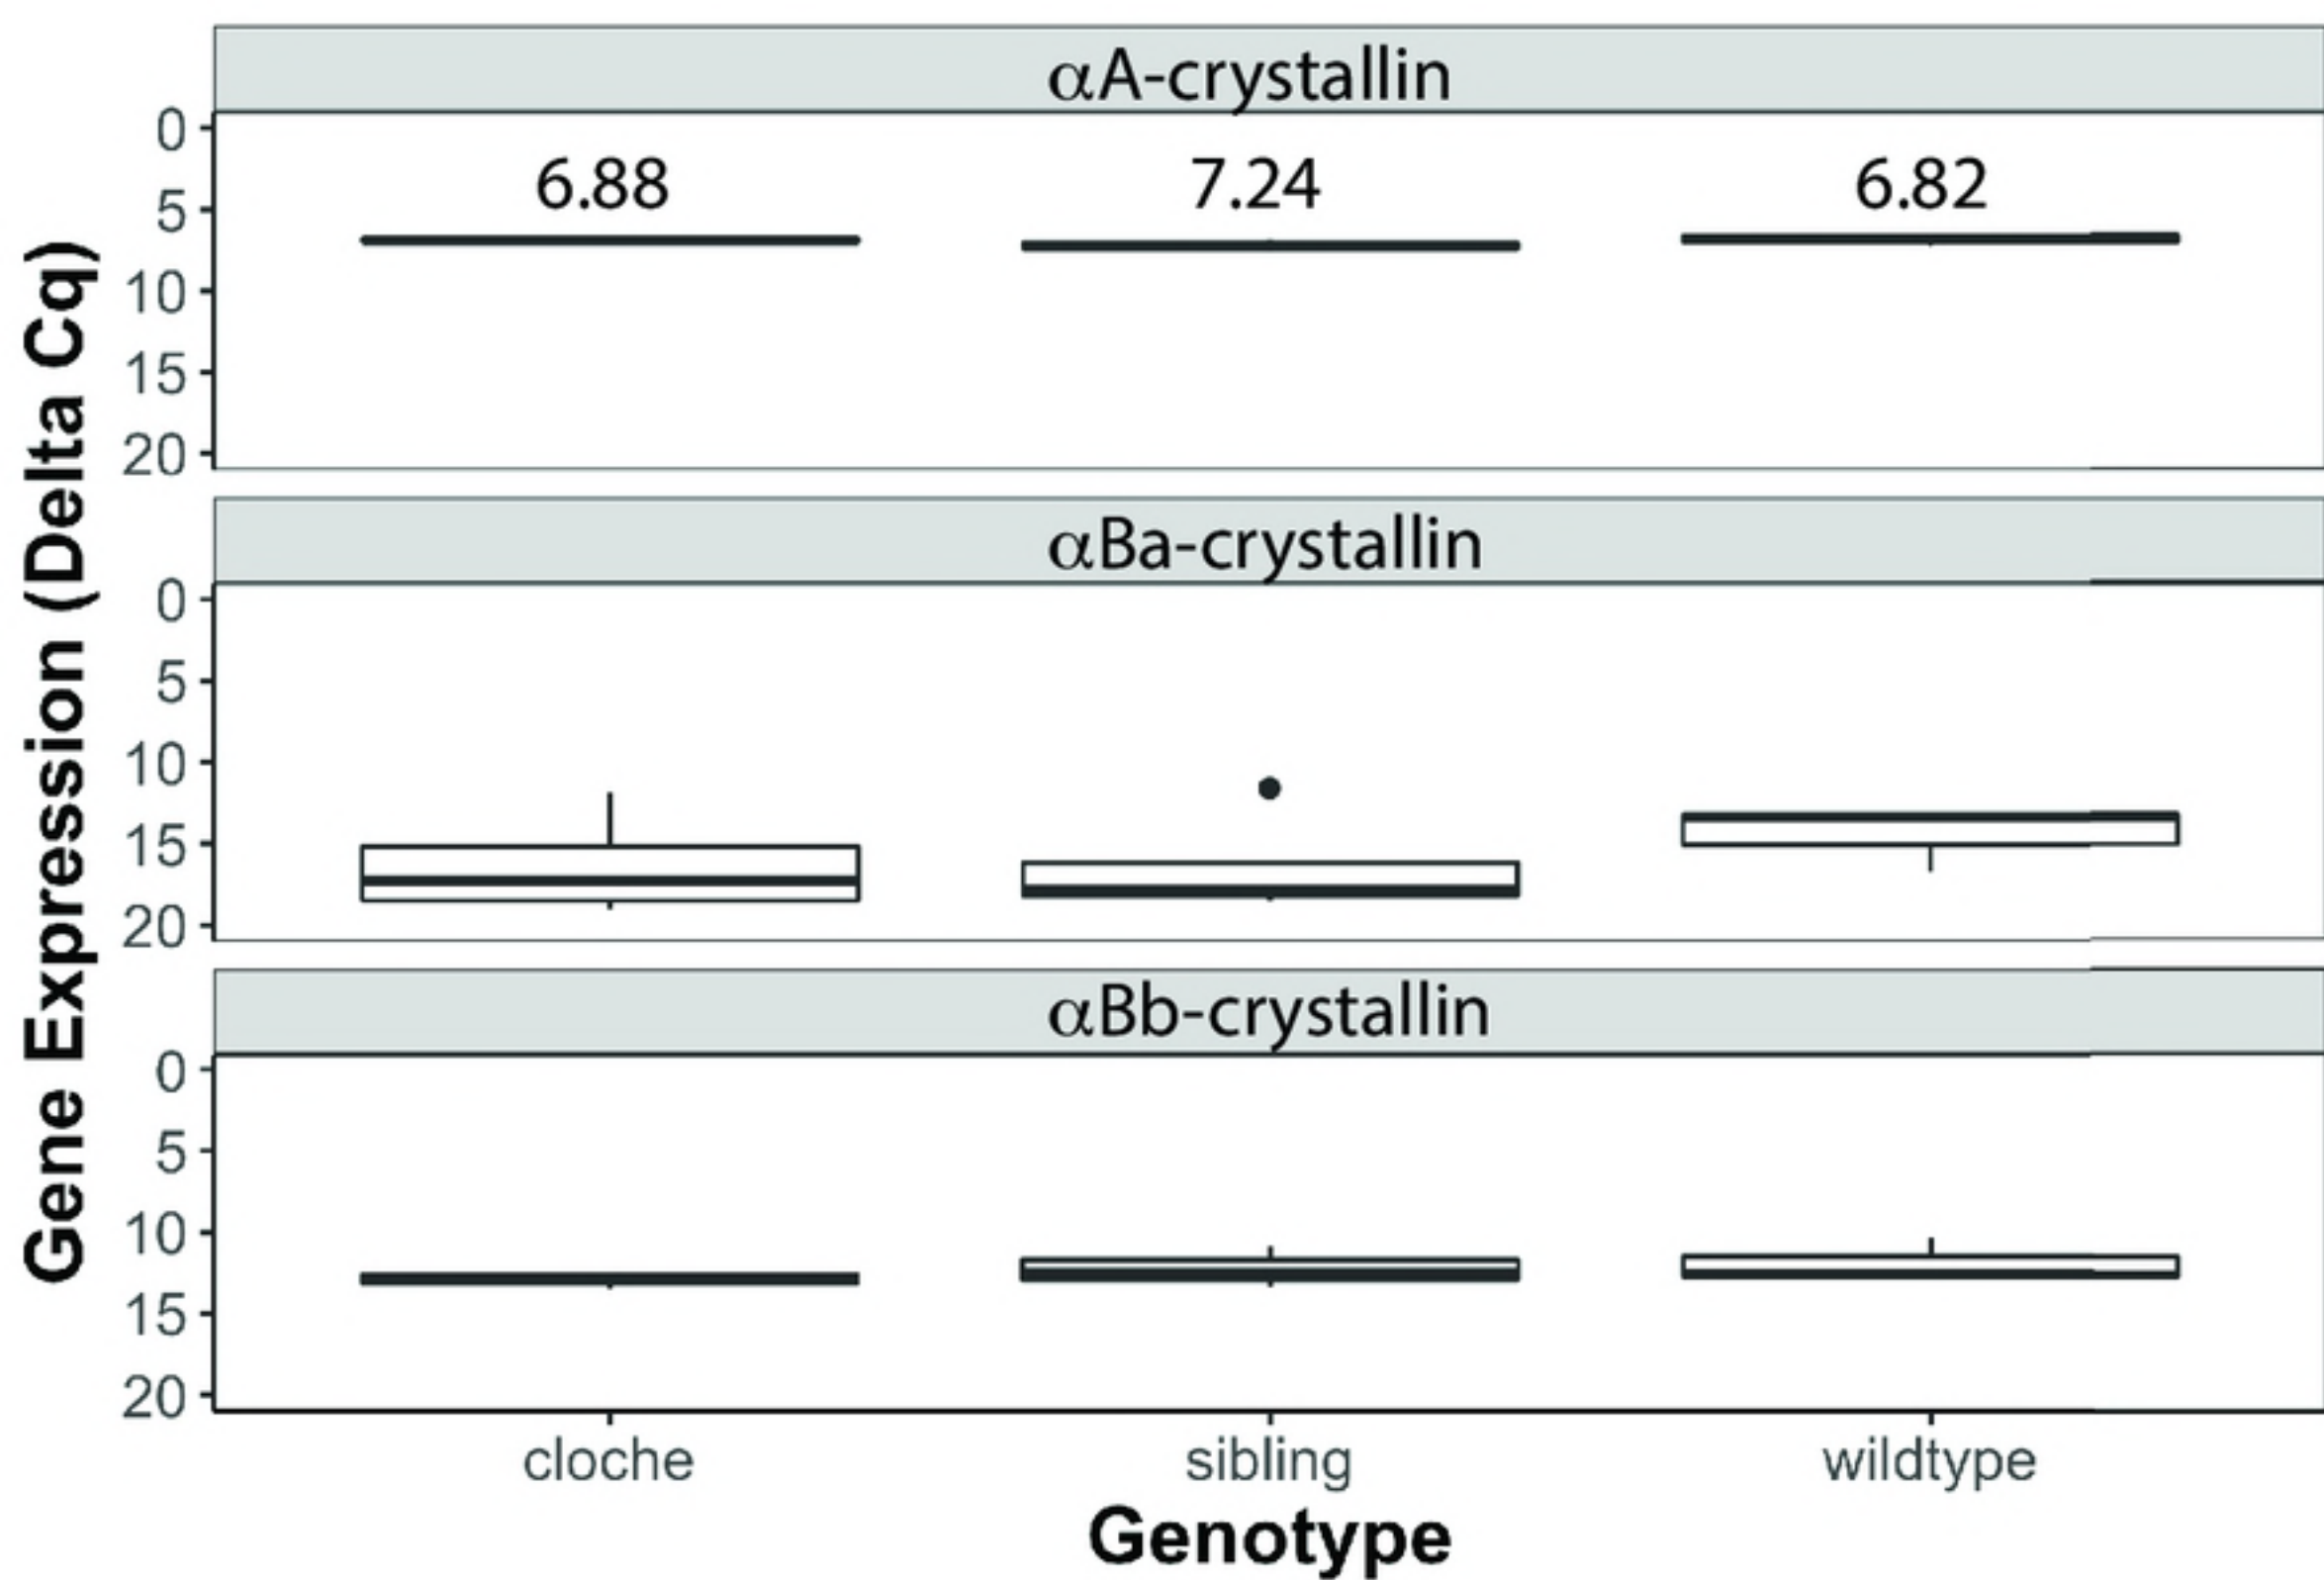

Figure 4

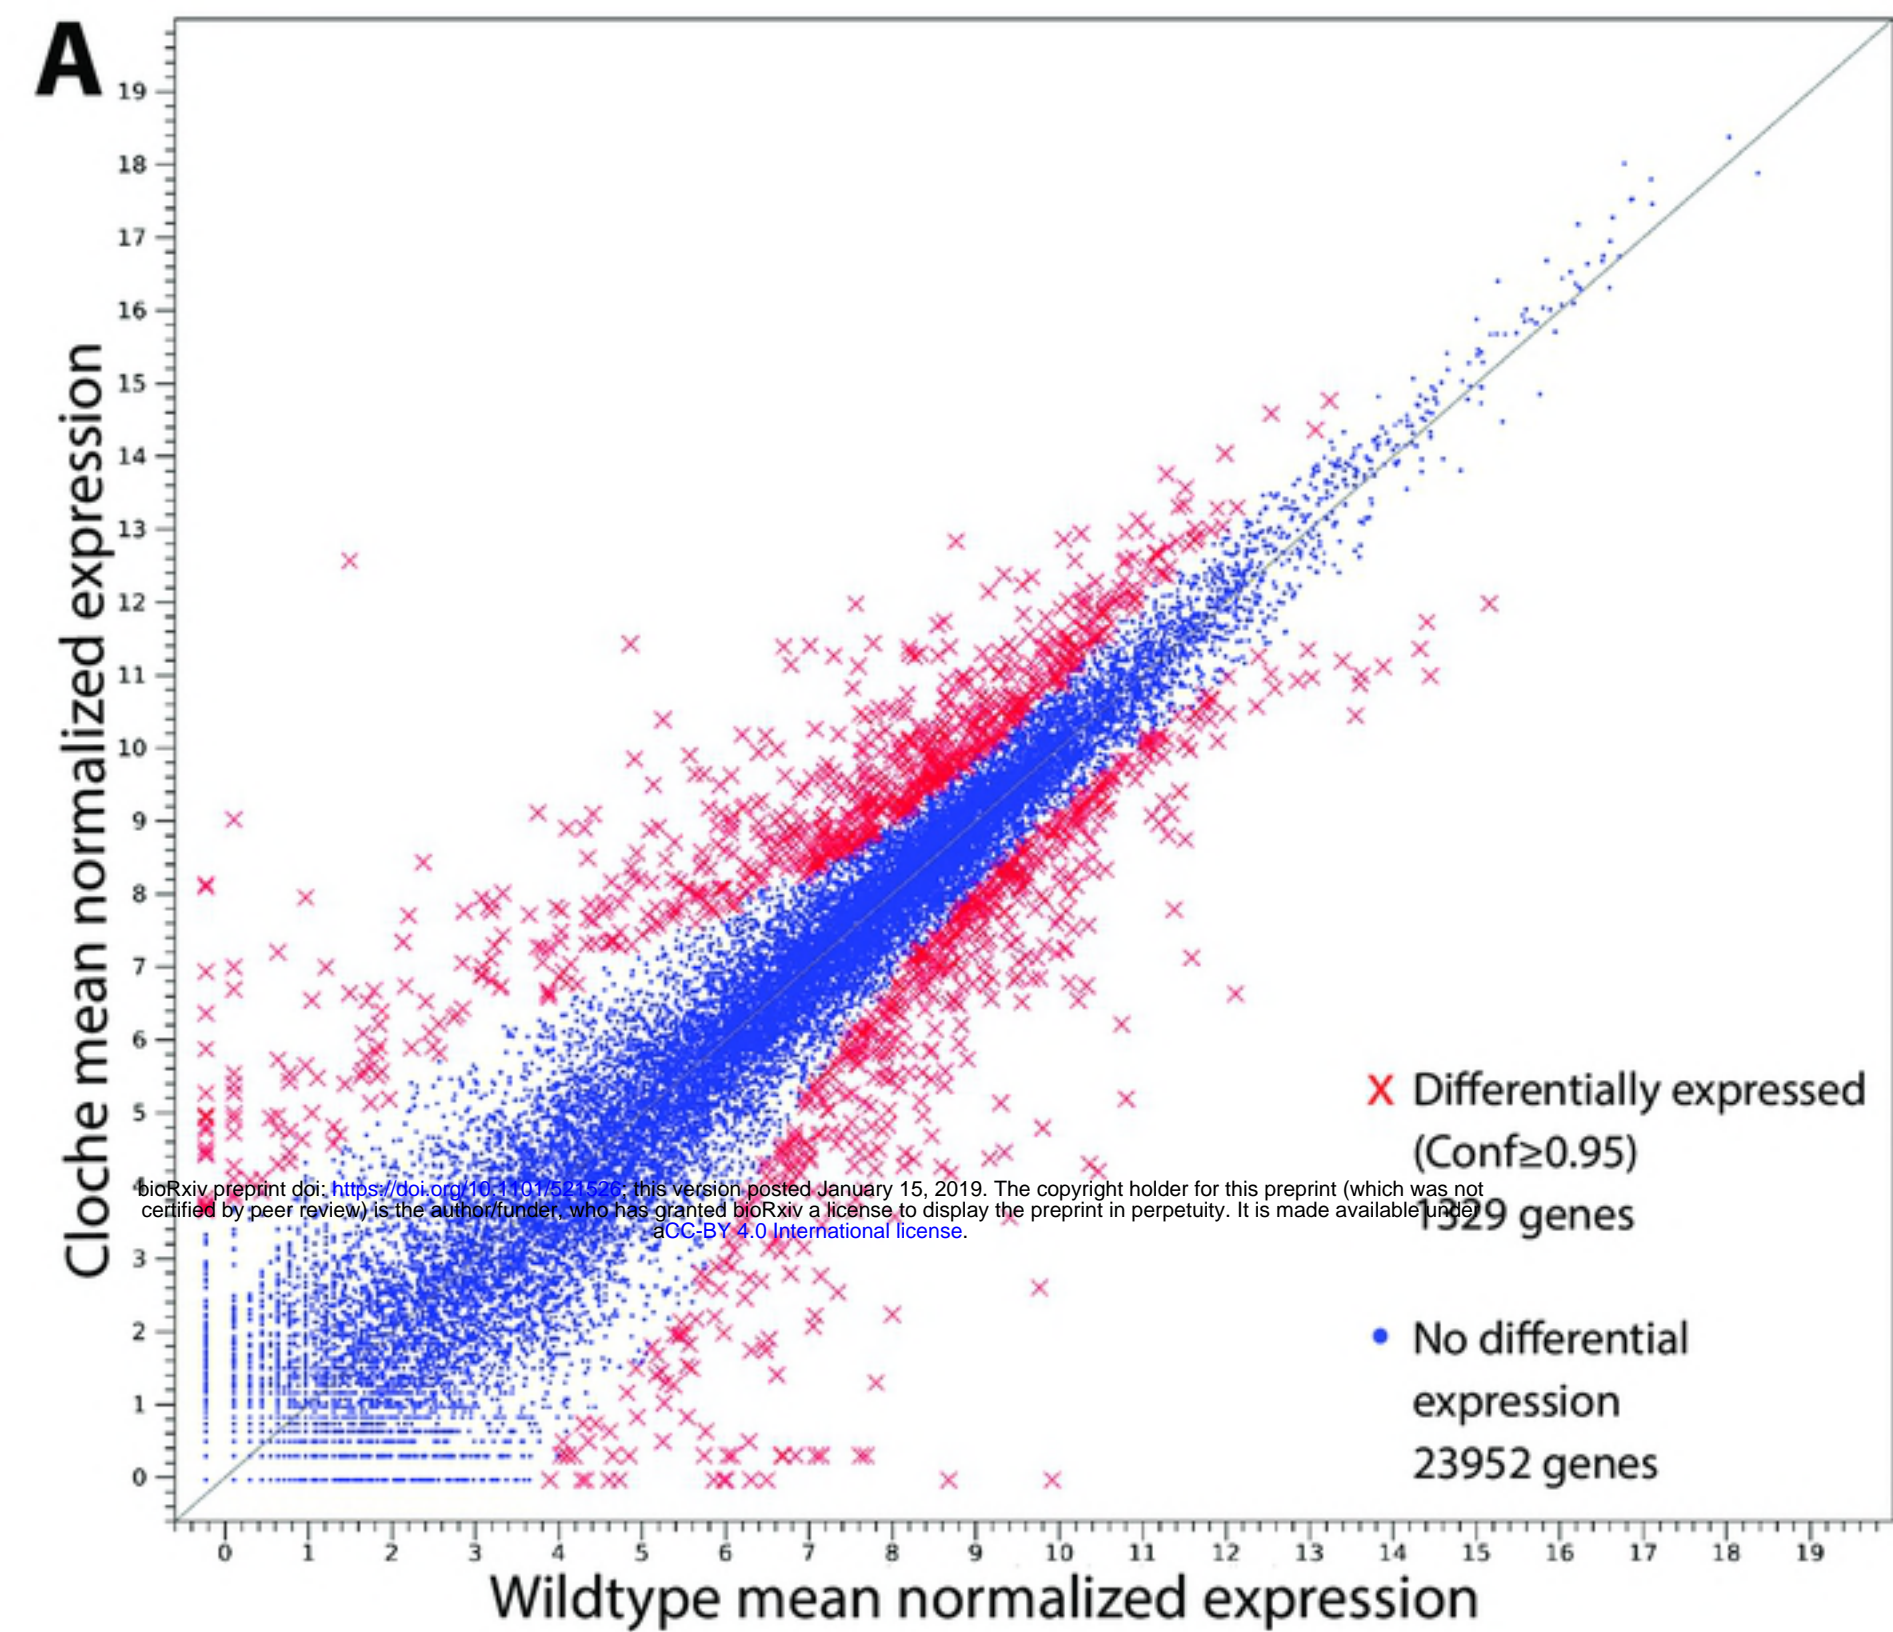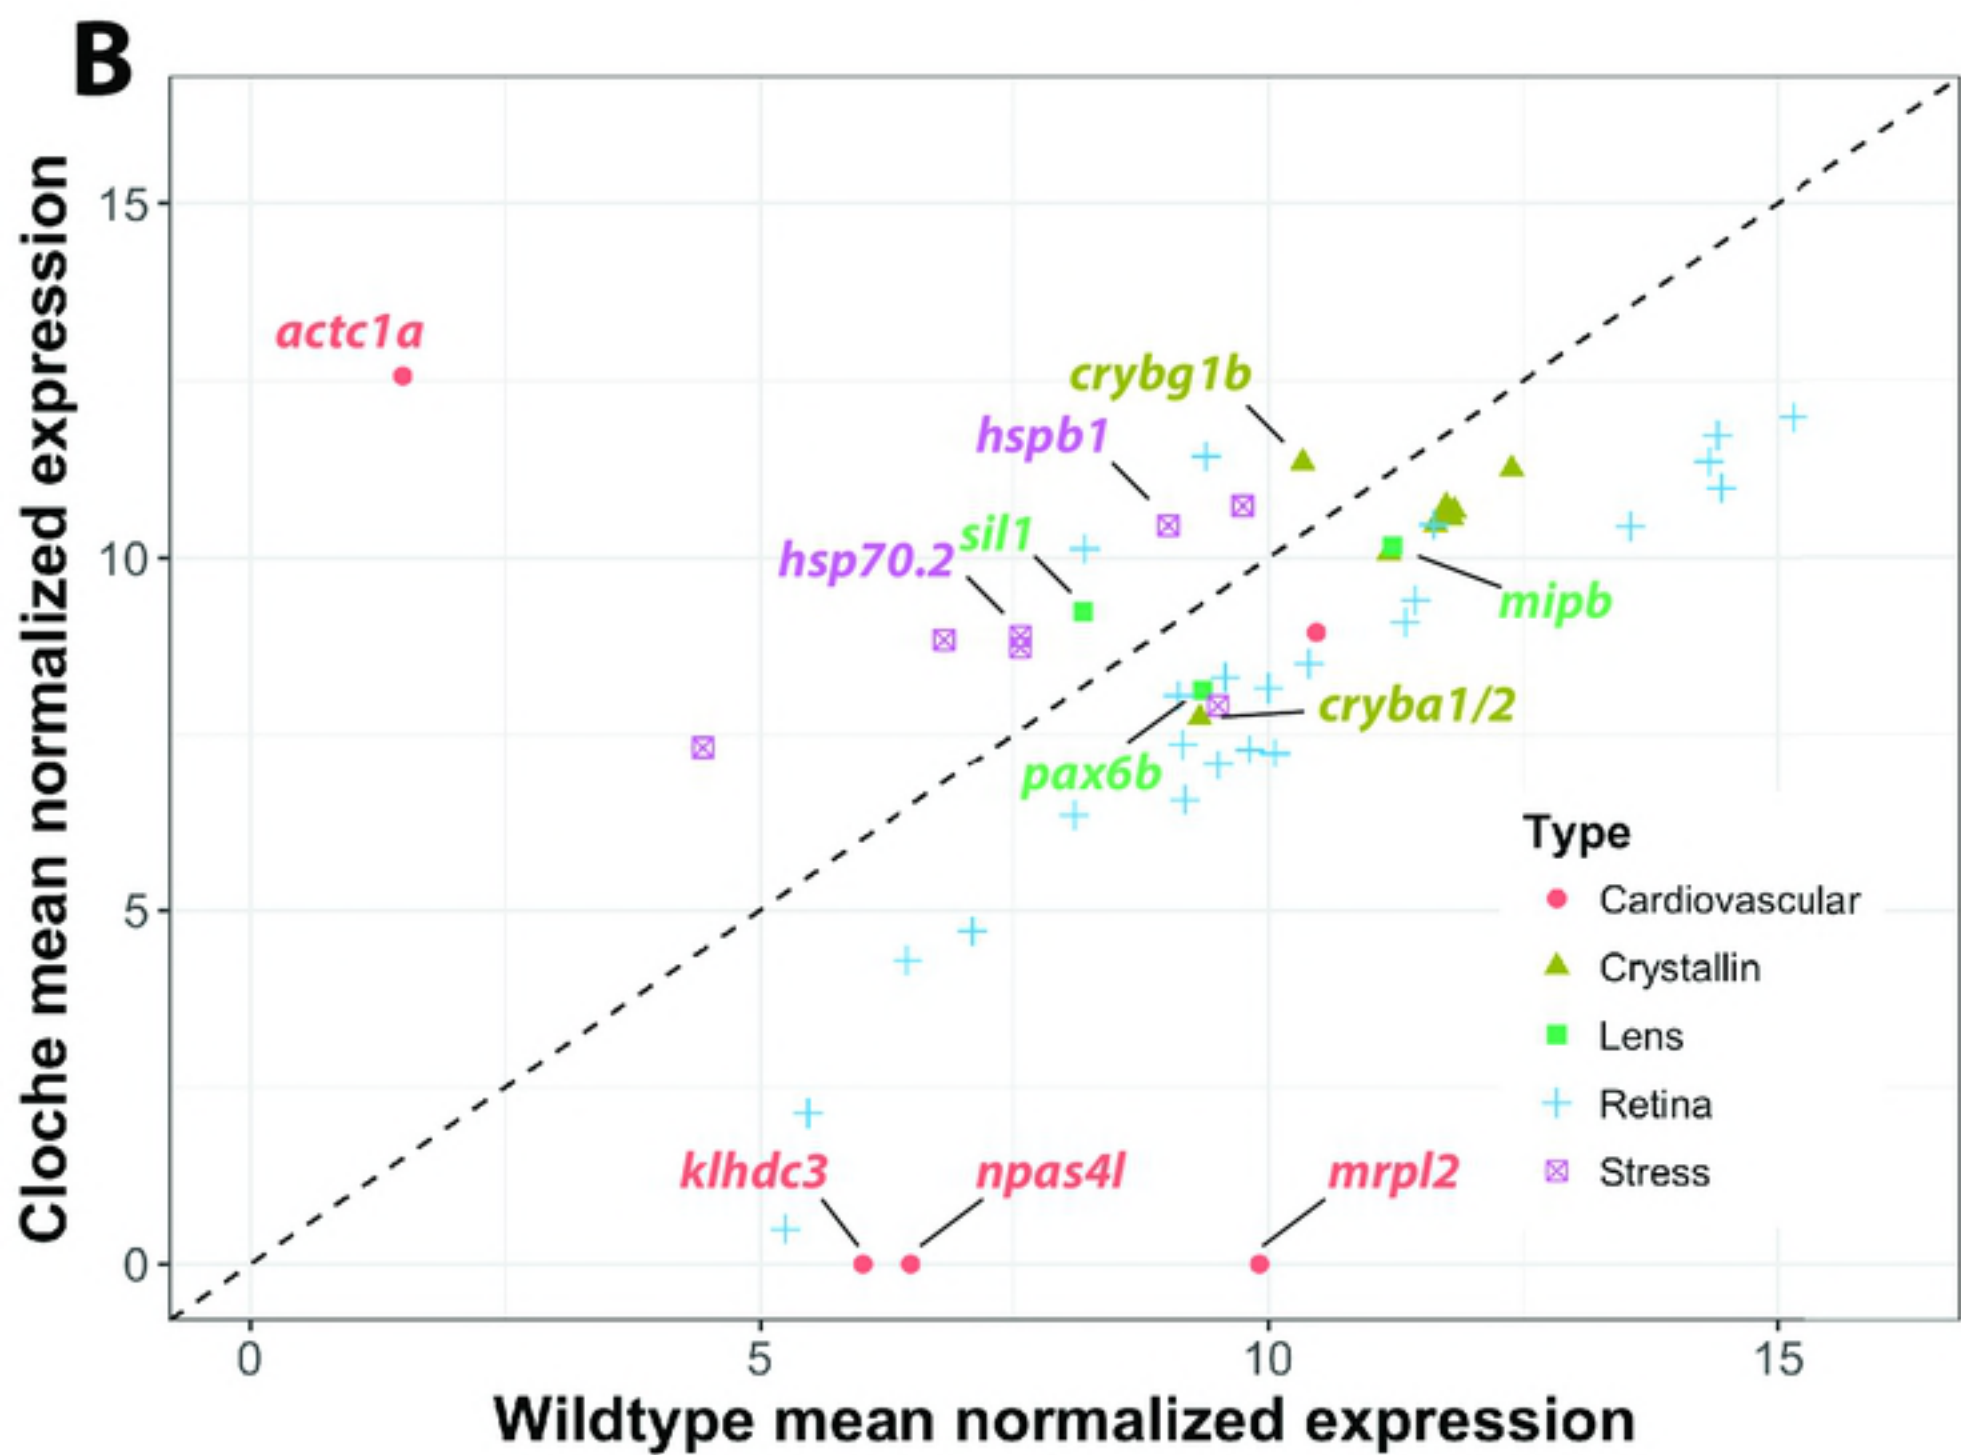

Figure 5



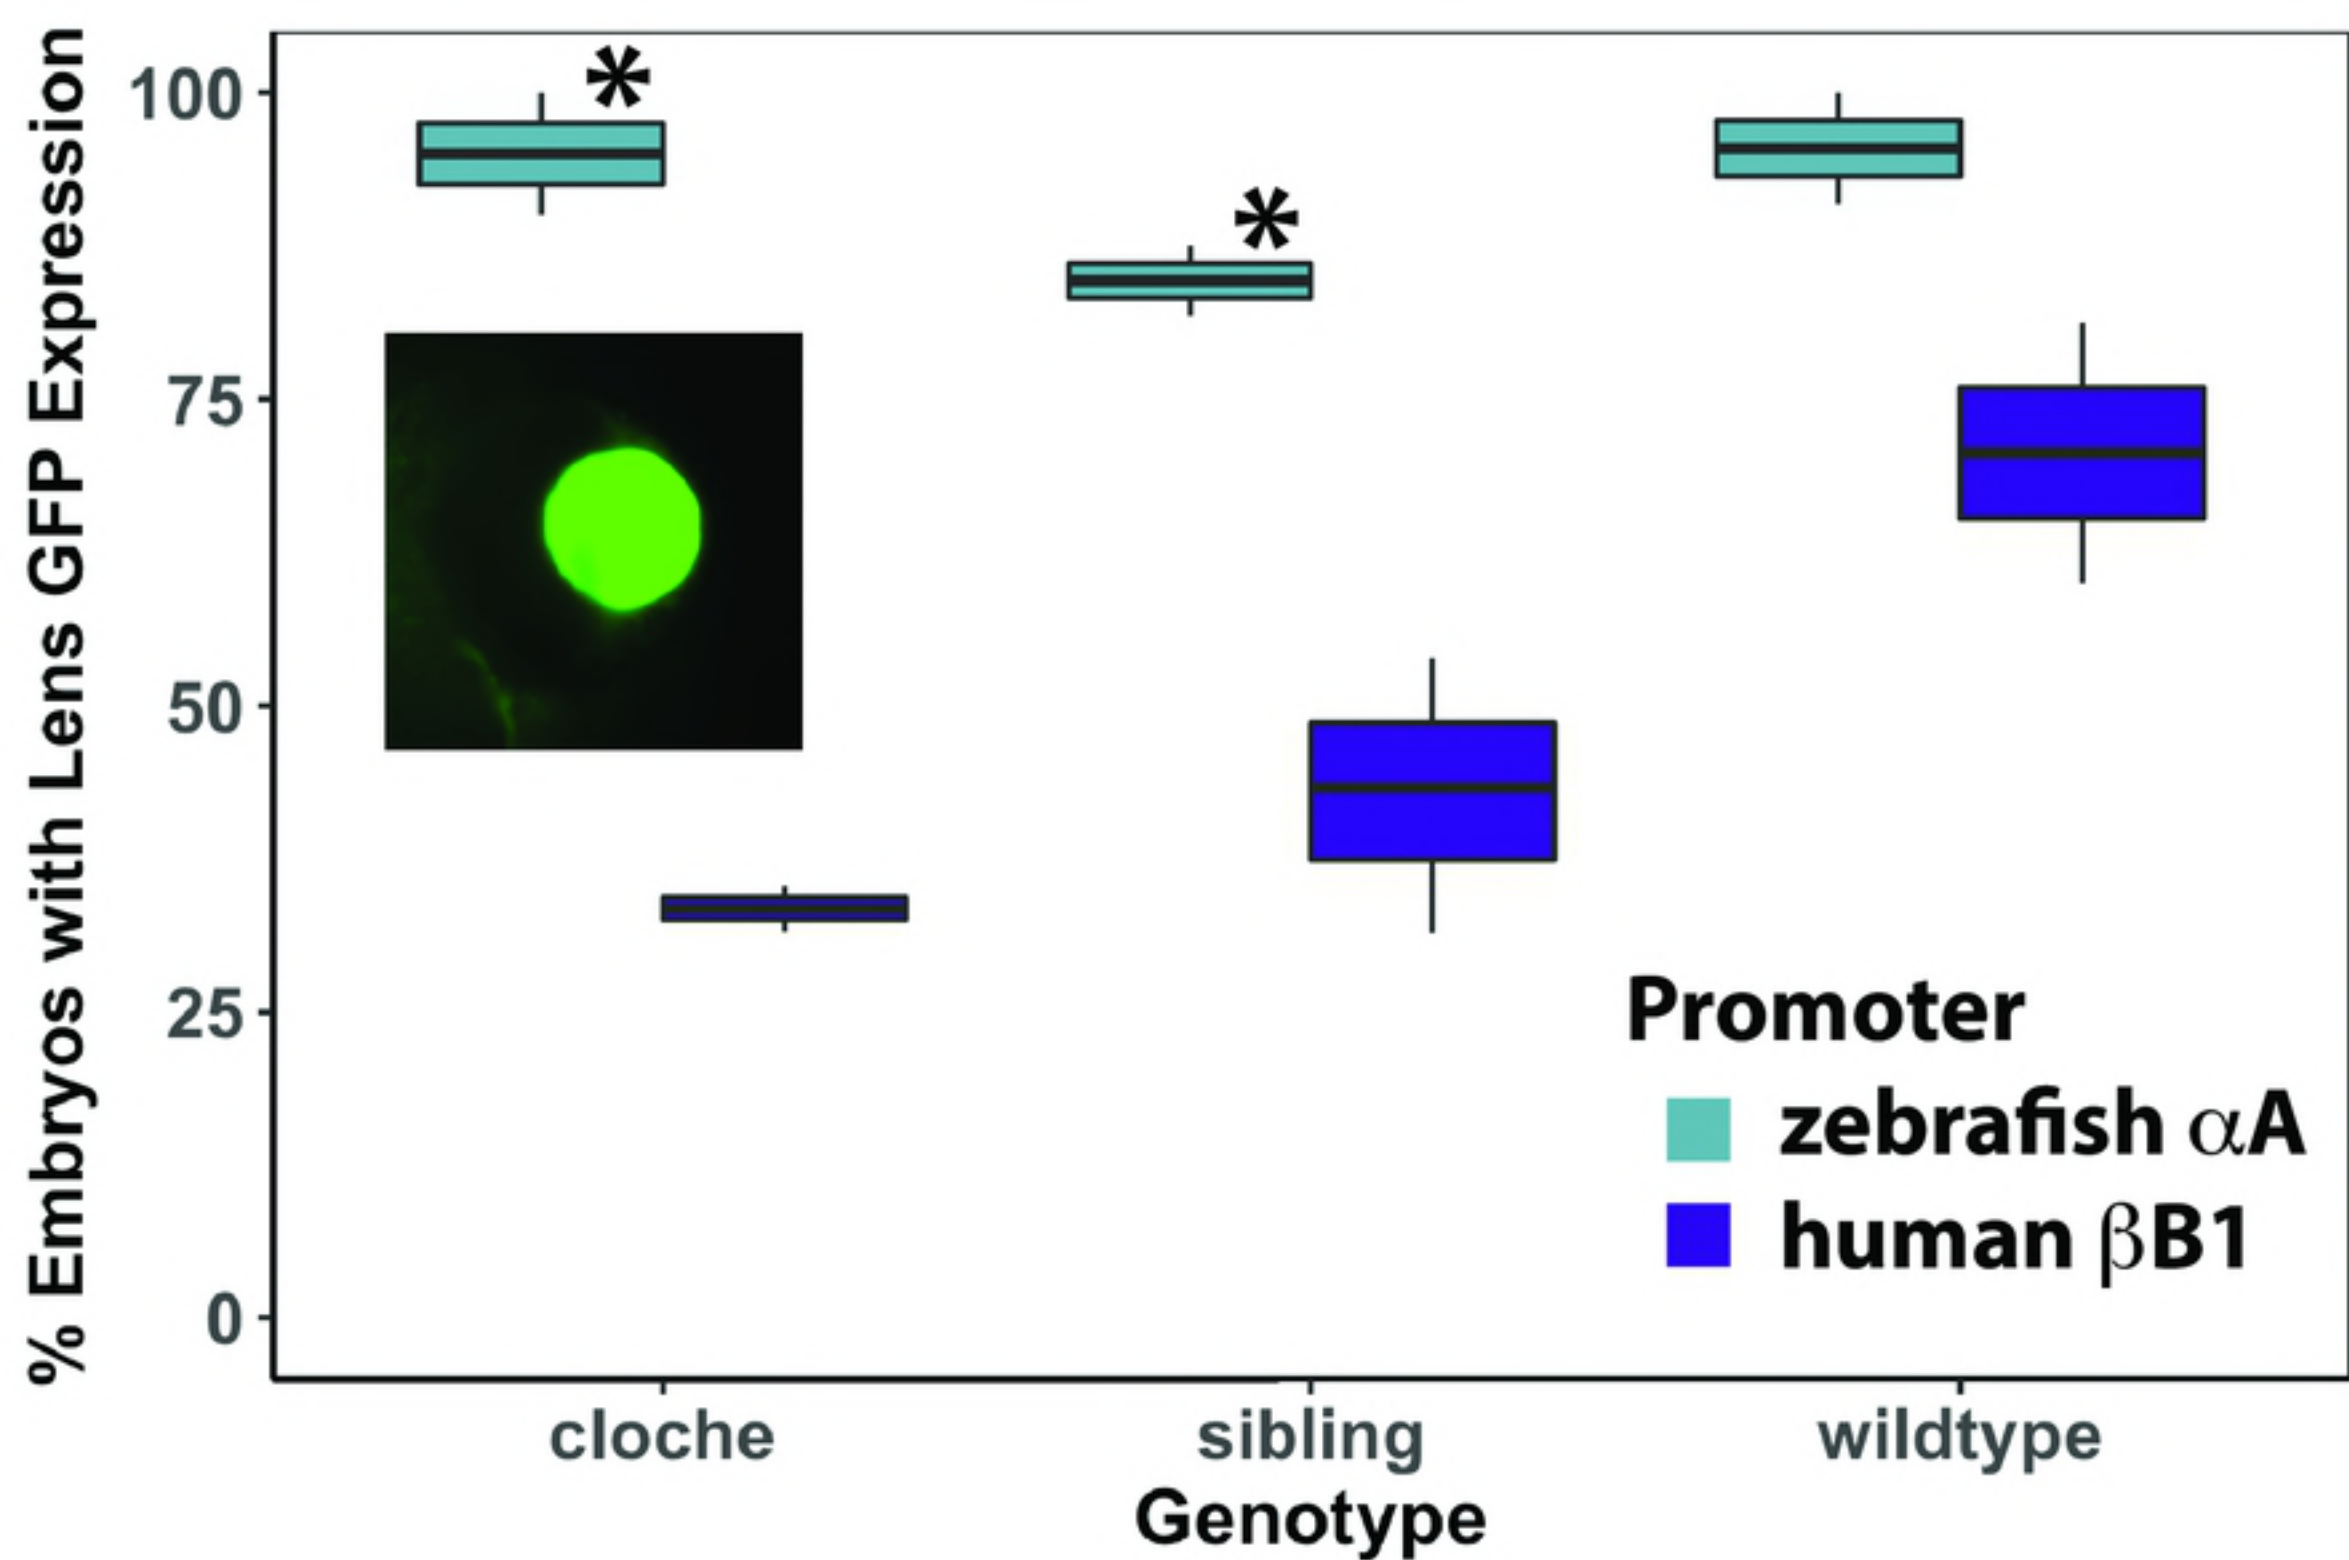

Figure 6

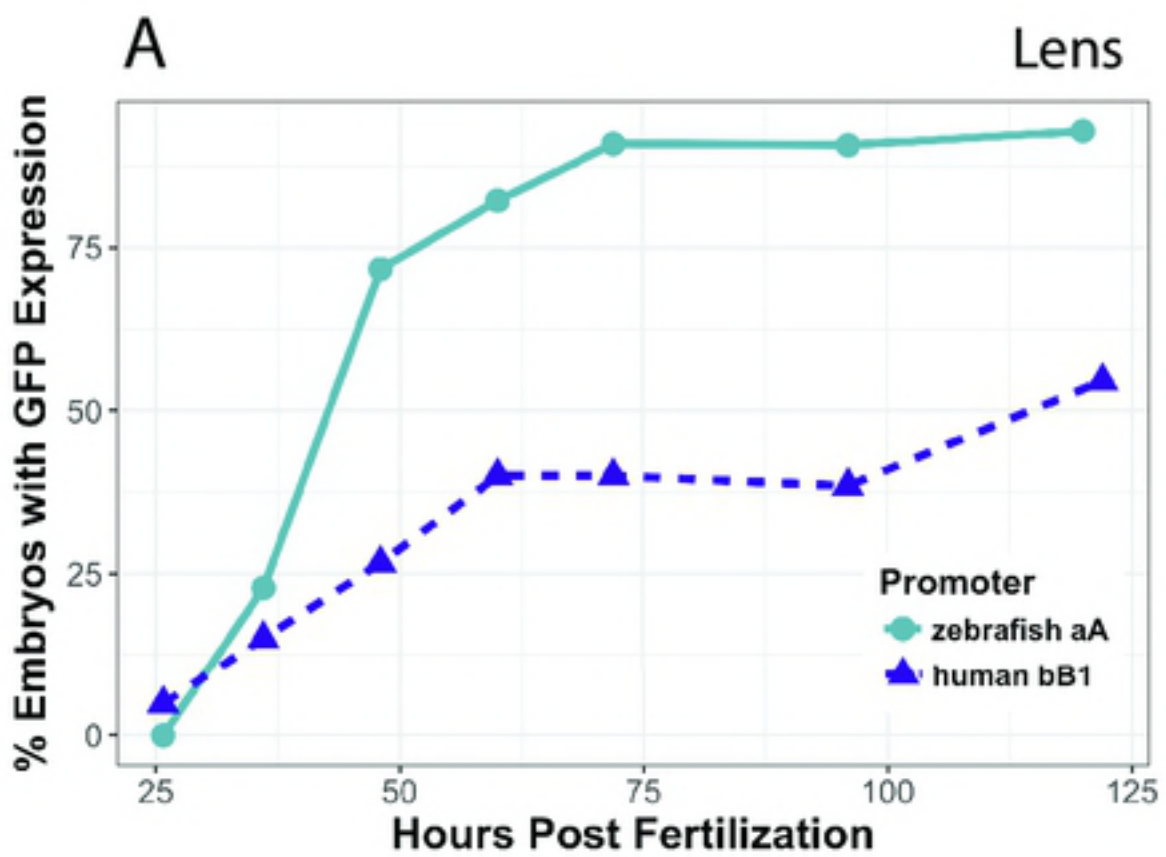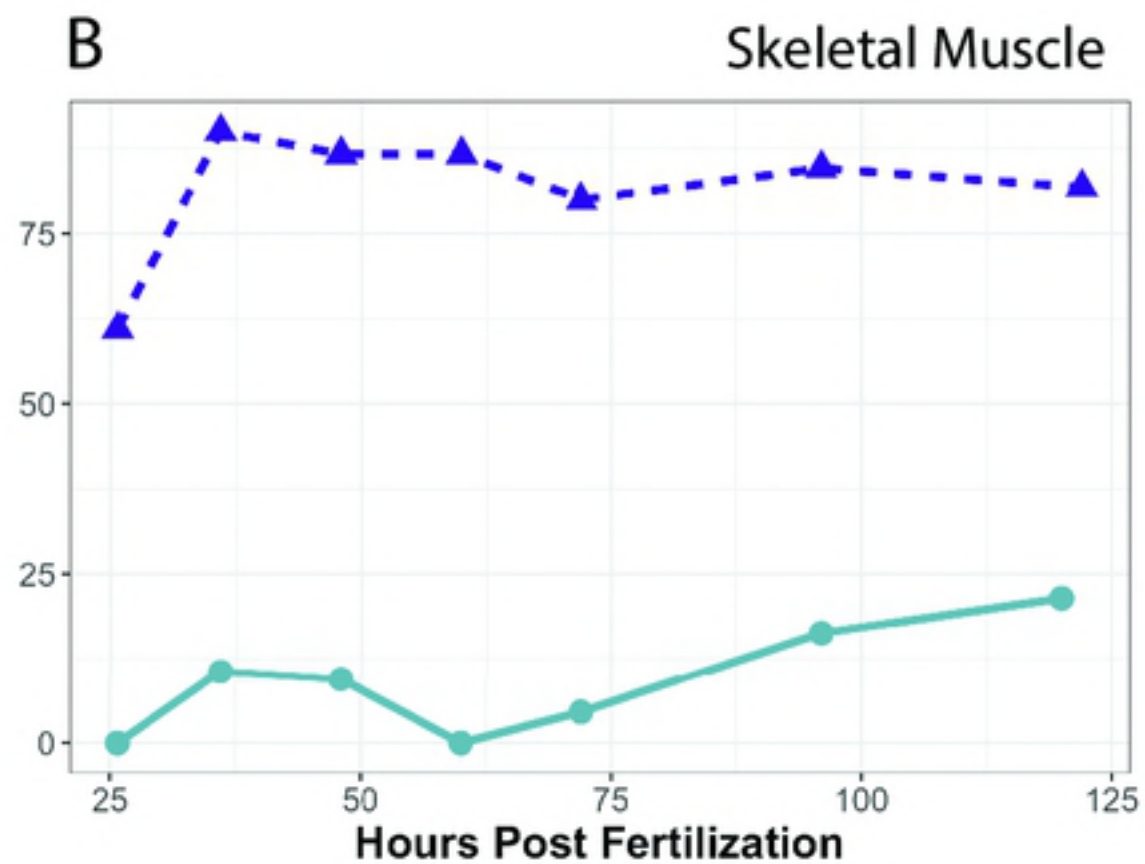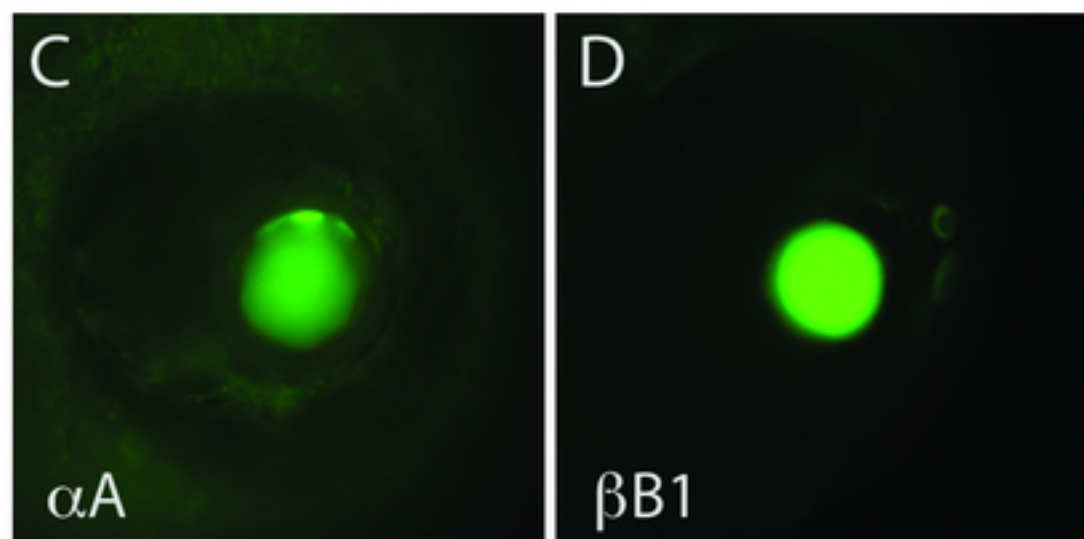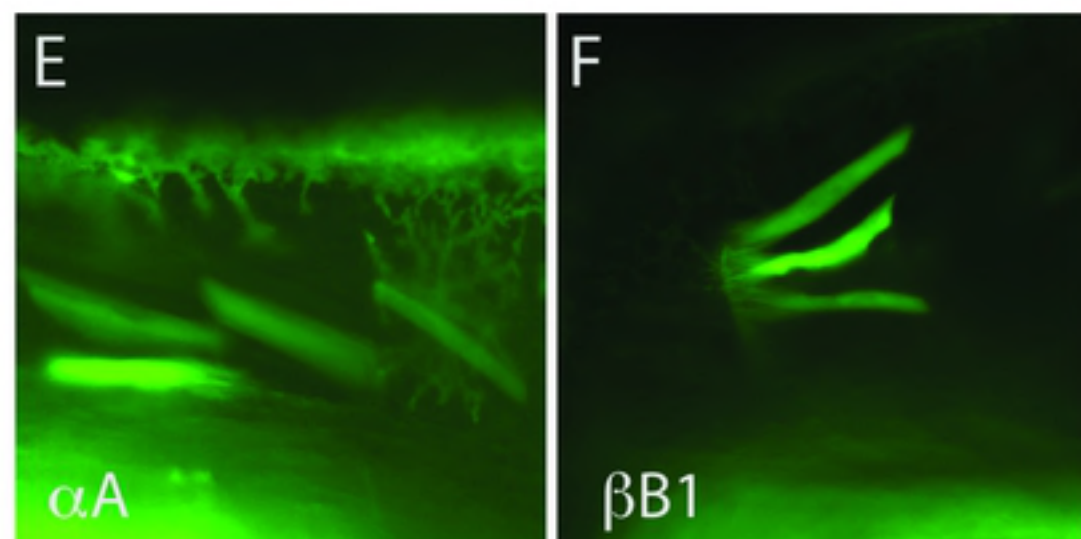

Figure 7
